# Supplementary material
Source: PubMed Central journal article supplement (PMC5065181)
Supplement: NIHMS821592-supplement-Supplemental.pdf [file NIHMS821592-supplement-Supplemental.pdf]

## Supplementary Online Content

Song N, Pogue-Geile KL, Gavin PG, et al. Clinical outcome from oxaliplatin treatment in stage II/III colon cancer according to intrinsic subtypes: secondary analysis of NSABP C-07/NRG Oncology randomized clinical trial. *JAMA Oncol*. Published online June 6, 2016.  
doi:10.1001/jamaoncol.2016.2314

**eTable 1.** Clinical and Pathological Features of eligible patients and patients in study cohort

**eMethods 1.** Selection of the discovery cohort in NSABP C-07

**eTable 2.** Clinical and Pathological Features of Discovery and Validation Cohorts: NSABP C-07

**eMethods 2.** Selection of genes for nCounter code set

**eTable 3.** Genes Included in the Custom-Designed nCounter Assay

**eMethods 3.** Analytical performance of mRNA expression profile by nCounter

**eFigure 1.** Reproducibility of C-07 Sample (C-07-0286R) Measured by nCounter

**eMethods 4.** Quality control of the nCounter data

**eTable 4.** Centroids for Redeveloped 72-gene Colorectal Cancer Assigner (CRCA) Classifier

**eFigure 2.** Graphical Presentation of Centroids for Redeveloped 72-gene Colorectal Cancer Assigner (CRCA) Classifier

**eMethods 5.** Cross-validation error of redeveloped colorectal cancer assigner classifier

**eTable 5.** Cross-Validation Error Rate of Redeveloped 72-gene Colorectal Cancer Assigner (CRCA) Classifier Compared to the Original Subtype Assignment by Sadanandam et al

**eMethods 6.** Colon Cancer Subtypes (CCS) assignment for C-07 samples

**eTable 6.** Centroid for Redeveloped Colon Cancer Subtypes (CCS) Classifier

**eMethods 7.** Power calculation of oxaliplatin benefit in enterocyte subtype

**eMethods 8.** Power calculation of enterocyte subtype as predictive biomarker

**eTable 7.** Univariate Analysis of Prognostic Value for Clinical Variables in C-07 Entire Dataset

**eFigure 3.** Forest Plot of Clinical Variables

**eResults 1.** The NCCN and oxaliplatin benefit in C-07

**eFigure 4.** Recurrence-free survival for NCCN Low-risk (A) and NCCN High-risk (B) Patients in NSABP C-07 (including discovery and validation cohorts) treated with FULV or FLOX (interaction  $p=0.125$ )

**eTable 8.** Correspondences between Colorectal Cancer Assigner (CRCA) and Colon Cancer Subtypes (CCS) Classifiers for Samples in Discovery, Validation, and Entire Datasets

**eTable 9.** Distribution of Colorectal Cancer Assigner (CRCA) Subtypes with Clinical and Pathological Variables in Discovery, Validation, and Entire Datasets

**eFigure 5.** Recurrence-free Survival for Colorectal Cancer Assigner subtypes (CRCA) and Colon Cancer Subtypes (CCS) in the Discovery Cohort

**eTable 10.** Univariate and Multivariable Cox Model for Colorectal Cancer Assigner (CRCA) Subtype Prognostic Value in Discovery Cohort

**eTable 11.** Univariate and Multivariable Cox model for Colon Cancer Subtypes (CCS) subtype Prognostic Value in Discovery Cohort

**eFigure 6.** Recurrence-free Survival for Colon Cancer Subtypes (CCS) and Colorectal Cancer Assigner (CRCA) Subtypes in the Discovery Cohort Treated with FULV and FLOX

**eFigure 7.** Recurrence-free Survival for Colorectal Cancer Assigner (CRCA) Subtypes of Stage II and III Patients in the Discovery Cohort Treated with FULV and FLOX

**eTable 12.** Univariate and Multivariable Cox model for CRC Subtype Prognostic Value in Validation Cohort

**eFigure 8.** Recurrence-free Survival for Colorectal Cancer Assigner (CRCA) and Subtype of Stage III Patients in the Validation Cohort Treated with FULV and FLOX

**eResults 2.** Consensus subtype assignment for C-07 samples

**eTable 13.** Correlation between Colorectal Cancer Assigner (CRCA) and Consensus Molecular Subtypes (CMS) Classifiers

**eFigure 9.** Oxaliplatin Benefit in Enterocyte versus Other Subtypes in All Stage III patients

**eFigure 10.** Recurrence-free Survival for Colorectal Cancer Assigner (CRCA) and CCS Subtype of Stage III Patients in the entire C-07 dataset Treated with FULV and FLOX

**eReferences**

This supplementary material has been provided by the authors to give readers additional information about their work.

**eTable 1. Clinical and Pathological Features of eligible patients and patients in study cohort**

| Characteristic                     | Eligible patients<br>N=2370 |      | Patients<br>in study cohort<br>N=1729 |      | P Value <sup>a</sup> |
|------------------------------------|-----------------------------|------|---------------------------------------|------|----------------------|
|                                    | n                           | %    | n                                     | %    |                      |
| Gender                             |                             |      |                                       |      |                      |
| Female                             | 1028                        | 43.4 | 744                                   | 43.0 | 0.85                 |
| Male                               | 1342                        | 56.6 | 985                                   | 57.0 |                      |
| Stage                              |                             |      |                                       |      |                      |
| II                                 | 680                         | 28.7 | 497                                   | 28.7 | 1                    |
| III                                | 1689                        | 71.3 | 1232                                  | 71.3 |                      |
| NA                                 | 1                           | 0    | 0                                     | 0    |                      |
| Node positive                      |                             |      |                                       |      |                      |
| 0                                  | 680                         | 28.7 | 497                                   | 28.7 | 0.97                 |
| 1-3                                | 1085                        | 45.8 | 797                                   | 46.1 |                      |
| 4+                                 | 604                         | 25.5 | 435                                   | 25.2 |                      |
| NA                                 | 1                           | 0    | 0                                     | 0    |                      |
| Grade                              |                             |      |                                       |      |                      |
| Differentiated                     | 1905                        | 80.4 | 1385                                  | 80.1 | 0.86                 |
| Undifferentiated                   | 465                         | 19.6 | 344                                   | 19.9 |                      |
| Tumor stage                        |                             |      |                                       |      |                      |
| T1                                 | 66                          | 2.8  | 34                                    | 2    | 0.39                 |
| T2                                 | 222                         | 9.4  | 157                                   | 9.1  |                      |
| T3                                 | 1916                        | 80.8 | 1420                                  | 82.1 |                      |
| T4                                 | 160                         | 6.8  | 118                                   | 6.8  |                      |
| NA                                 | 6                           | 0.3  | 0                                     | 0    |                      |
| Perforation                        |                             |      |                                       |      |                      |
| No                                 | 2305                        | 97.3 | 1687                                  | 97.6 | 0.66                 |
| Yes                                | 64                          | 2.7  | 42                                    | 2.4  |                      |
| Obstruction                        |                             |      |                                       |      |                      |
| No                                 | 1917                        | 81.3 | 1389                                  | 80.8 | 0.72                 |
| Yes                                | 441                         | 18.7 | 330                                   | 19.2 |                      |
| NA                                 | 0                           | 0    | 4                                     | 0.4  |                      |
| Recurrence-free interval<br>status |                             |      |                                       |      |                      |
| Censored                           | 1704                        | 71.9 | 1231                                  | 71.2 | 0.65                 |
| Event                              | 666                         | 28.1 | 498                                   | 28.8 |                      |

<sup>a</sup>P Value: Associations of clinical and pathological features variable with discovery and validation cohort were analyzed by the chi-square test without correcting for missing values.

### **eMethods 1. Selection of the discovery cohort in NSABP C-07**

In an unpublished study, we tried to develop a predictive algorithm for oxaliplatin benefit through gene expression profiling of entire NSABP C-07 cases with WG-DASL array, which was designed to be optimized for FFPET samples. However, after we had assayed about half of the cohort in a chronological order of block submission, Illumina stopped manufacturing WG-DASL arrays. Because we did not have a good alternative technology for microarray profiling of FFPET at that time and with budget considerations, we decided to use the WG-DASL assayed cases to discover candidate prognostic and predictive genes and designed a custom nCounter probe set, which was then used to profile the entire C-07 cohort. During the entire process, those cases that were not profiled with WG-DASL remained un-linked to clinical data.

For the testing of the hypothesis that molecular subtypes interact with oxaliplatin, we considered several issues. First, although molecular subtypes were described after the design of our custom nCounter probe set and we can justify testing the hypothesis using the entire cohort, we decided not to do so because we did not know the direction of interaction. We determined that first we had to discover the direction of interaction and then validate in an independent cohort. However, access to tumor tissue bank from other oxaliplatin trials was not certain. Therefore, we decided to split NSABP C-07 into discovery and validation cohorts. Second, we thought it would be prudent to keep the original cohort separation intact because the nCounter probe set was designed based on WG-DASL data, and therefore decided to divide the C-07 cohort into discovery and validation cohorts based on whether the cases were assayed with WG-DASL or not.

**eTable 2. Clinical and Pathological Features of Discovery and Validation Cohorts: NSABP C-07**

| Characteristic   | Discovery<br>N=848 |      | Validation<br>N=881 |      | P Value <sup>a</sup> |
|------------------|--------------------|------|---------------------|------|----------------------|
|                  | n                  | %    | n                   | %    |                      |
| Gender           |                    |      |                     |      |                      |
| Female           | 357                | 42.1 | 387                 | 43.9 | 0.47                 |
| Male             | 491                | 57.9 | 494                 | 56.1 |                      |
| Stage            |                    |      |                     |      |                      |
| II               | 260                | 30.7 | 237                 | 26.9 | 0.09                 |
| III              | 588                | 69.3 | 644                 | 73.1 |                      |
| Node positive    |                    |      |                     |      |                      |
| 0                | 260                | 30.7 | 237                 | 26.9 | 0.04                 |
| 1-3              | 396                | 46.7 | 401                 | 45.5 |                      |
| 4+               | 192                | 22.6 | 243                 | 27.6 |                      |
| Grade            |                    |      |                     |      |                      |
| Differentiated   | 680                | 80.2 | 705                 | 80.0 | 0.98                 |
| Undifferentiated | 168                | 19.8 | 176                 | 20.0 |                      |
| Tumor stage      |                    |      |                     |      |                      |
| T1               | 13                 | 1.5  | 21                  | 2.4  | 0.36                 |
| T2               | 71                 | 8.4  | 86                  | 9.8  |                      |
| T3               | 709                | 83.6 | 711                 | 80.7 |                      |
| T4               | 55                 | 6.5  | 63                  | 7.2  |                      |
| Perforation      |                    |      |                     |      |                      |
| No               | 827                | 97.5 | 860                 | 97.6 | 1.00                 |
| Yes              | 21                 | 2.5  | 21                  | 2.4  |                      |
| Obstruction      |                    |      |                     |      |                      |
| No               | 701                | 83.3 | 688                 | 78.1 | 0.01                 |
| Yes              | 141                | 16.7 | 189                 | 21.5 |                      |
| NA               | 0                  | 0    | 4                   | 0.4  |                      |
| MMR status       |                    |      |                     |      |                      |
| pMMR             | 665                | 88.8 | 554                 | 62.9 | 0.68                 |
| dMMR             | 84                 | 11.2 | 76                  | 8.6  |                      |
| NA               | 0                  | 0    | 251                 | 28.5 |                      |
| <i>BRAF</i>      |                    |      |                     |      |                      |
| Wild type        | 716                | 84.4 | 682                 | 77.4 | 0.67                 |
| Mutant           | 126                | 14.9 | 112                 | 12.7 |                      |
| NA               | 6                  | 0.7  | 87                  | 9.9  |                      |
| <i>KRAS</i>      |                    |      |                     |      |                      |
| Wild type        | 506                | 59.7 | 426                 | 48.4 | 0.98                 |
| Mutant           | 317                | 37.4 | 269                 | 30.5 |                      |
| NA               | 25                 | 2.9  | 186                 | 21.1 |                      |

|                                 |     |      |     |      |      |
|---------------------------------|-----|------|-----|------|------|
| <i>NRAS</i>                     |     |      |     |      |      |
| Wild type                       | 799 | 94.2 | 657 | 74.6 | 0.91 |
| Mutant                          | 20  | 2.4  | 18  | 2.0  |      |
| NA                              | 29  | 3.4  | 206 | 23.4 |      |
| <i>PIK3CA</i>                   |     |      |     |      |      |
| Wild type                       | 644 | 75.9 | 569 | 64.6 | 0.16 |
| Mutant                          | 179 | 21.1 | 131 | 14.9 |      |
| NA                              | 25  | 2.9  | 181 | 20.5 |      |
| Recurrence-free interval status |     |      |     |      |      |
| Censored                        | 601 | 70.9 | 630 | 71.5 | 0.81 |
| Event                           | 247 | 29.1 | 251 | 28.5 |      |

<sup>a</sup>P Value: Associations of clinical and pathological features variable with discovery and validation cohort were analyzed by the chi-square test without correcting for missing values.

Abbreviations: MMR, mismatch repair status; pMMR, proficient MMR; dMMR, deficient MMR.

## **Gene Expression Profiling Using nCounter Assay**

### **eMethods 2. Selection of genes for nCounter code set**

The 295 genes were selected for the following reasons: the genes were prognostic or predictive for oxaliplatin benefit in the C-07 discovery cohort or were part of significant pathways using C-07 WG-DASL data. We also included prognostic genes from a discovery set of NSABP C-08 WG-DASL data and C-08 nCounter data. It should be noted however, that the analytical measurement of the same gene targets by WG-DASL and nCounter are only moderately correlated, and therefore we cannot build a predictive algorithm using WG-DASL data and hope that the same algorithm will work in nCounter dataset despite the fact that same gene targets were measured. Therefore, it is meaningless to discuss WG-DASL assay results or detailed design of the nCounter probe set. Suffice it to state that WG-DASL provided a starting point to pick potential candidate predictive genes when we designed our nCounter assay.

**eTable 3. Genes Included in the Custom-Designed nCounter Assay**

| <b>GENE</b>      |
|------------------|
| <i>ABCA3</i>     |
| <i>ABCC1</i>     |
| <i>ABCC2</i>     |
| <i>ABCC5</i>     |
| <i>ABCC9</i>     |
| <i>ABCD1</i>     |
| <i>ABCG2</i>     |
| <i>ACOT7</i>     |
| <i>ACTA2</i>     |
| <i>ADAM28</i>    |
| <i>ADAMTS12</i>  |
| <i>ADAMTS5</i>   |
| <i>ADRA1B</i>    |
| <i>AGPAT5</i>    |
| <i>AKAP12</i>    |
| <i>AKR1E2</i>    |
| <i>ALDH3B2</i>   |
| <i>ANKRD44</i>   |
| <i>ANKRD6</i>    |
| <i>ARHGEF10L</i> |
| <i>ASPRV1</i>    |
| <i>ASPSCR1</i>   |
| <i>ATF1</i>      |
| <i>ATG9A</i>     |
| <i>ATP5E</i>     |
| <i>ATP7B</i>     |
| <i>BAX</i>       |
| <i>BCL2</i>      |
| <i>BGN</i>       |
| <i>BHLHE41</i>   |
| <i>BMP7</i>      |
| <i>BST1</i>      |
| <i>BTBD11</i>    |
| <i>BTG1</i>      |
| <i>C13orf16</i>  |
| <i>C16orf45</i>  |
| <i>C17orf79</i>  |
| <i>C19orf18</i>  |
| <i>C19orf48</i>  |
| <i>C19orf59</i>  |
| <i>C1QTNF3</i>   |



|                   |
|-------------------|
| <i>C20orf103</i>  |
| <i>C20orf195</i>  |
| <i>C5orf4</i>     |
| <i>C6orf15</i>    |
| <i>C7orf44</i>    |
| <i>C8orf84</i>    |
| <i>CAB39L</i>     |
| <i>CALB2</i>      |
| <i>CASP3</i>      |
| <i>CASP8</i>      |
| <i>CCDC74A</i>    |
| <i>CCDC85A</i>    |
| <i>CCL25</i>      |
| <i>CCR7</i>       |
| <i>CD160</i>      |
| <i>CD27</i>       |
| <i>CD28</i>       |
| <i>CD3D</i>       |
| <i>CD4</i>        |
| <i>CD8A</i>       |
| <i>CDCA2</i>      |
| <i>CDH23</i>      |
| <i>CDK1</i>       |
| <i>CDK14</i>      |
| <i>CDKN2B</i>     |
| <i>CGB1</i>       |
| <i>CKMT2</i>      |
| <i>CLEC4E</i>     |
| <i>CNOT7</i>      |
| <i>COL11A1</i>    |
| <i>COL17A1</i>    |
| <i>COL8A1</i>     |
| <i>COMP</i>       |
| <i>COX17</i>      |
| <i>CPE</i>        |
| <i>CRYAB</i>      |
| <i>CSGALNACT1</i> |
| <i>CTLA4</i>      |
| <i>CXCL10</i>     |
| <i>CXCL11</i>     |
| <i>CXCL13</i>     |
| <i>CXCL2</i>      |
| <i>CXCL9</i>      |

|                 |
|-----------------|
| <i>CXCR6</i>    |
| <i>CXCR7</i>    |
| <i>CYP1B1</i>   |
| <i>CYP2C18</i>  |
| <i>CYP4F2</i>   |
| <i>DAPK1</i>    |
| <i>DCBLD2</i>   |
| <i>DENND3</i>   |
| <i>DFFB</i>     |
| <i>DLX5</i>     |
| <i>DNER</i>     |
| <i>DPEP1</i>    |
| <i>DUSP10</i>   |
| <i>EPB41</i>    |
| <i>EPB41LAB</i> |
| <i>EPHB6</i>    |
| <i>ERAP2</i>    |
| <i>ERCC1</i>    |
| <i>ERCC4</i>    |
| <i>ERCC8</i>    |
| <i>EXO1</i>     |
| <i>F5</i>       |
| <i>FAM178B</i>  |
| <i>FAP</i>      |
| <i>FCRL4</i>    |
| <i>FGF19</i>    |
| <i>FGL2</i>     |
| <i>FN1</i>      |
| <i>FNDC1</i>    |
| <i>FOXC2</i>    |
| <i>FOXN3</i>    |
| <i>FOXP3</i>    |
| <i>FREM1</i>    |
| <i>FSTL5</i>    |
| <i>GABRR1</i>   |
| <i>GADD45B</i>  |
| <i>GBP1</i>     |
| <i>GBP4</i>     |
| <i>GLDN</i>     |
| <i>GNG12</i>    |
| <i>GPX1</i>     |
| <i>GPX3</i>     |
| <i>GRB2</i>     |

|                 |
|-----------------|
| <i>GRM8</i>     |
| <i>GSTM5</i>    |
| <i>GSTP1</i>    |
| <i>GUSB</i>     |
| <i>GZMB</i>     |
| <i>HCG9</i>     |
| <i>HDAC9</i>    |
| <i>HEATR8</i>   |
| <i>HELB</i>     |
| <i>HEYL</i>     |
| <i>HGD</i>      |
| <i>HIST1H3B</i> |
| <i>HIST1H3I</i> |
| <i>HJURP</i>    |
| <i>HNFB1</i>    |
| <i>HOXA13</i>   |
| <i>HPRT1</i>    |
| <i>HSD17B2</i>  |
| <i>HTRA2</i>    |
| <i>HYAL1</i>    |
| <i>ID4</i>      |
| <i>IDO1</i>     |
| <i>IGFBP3</i>   |
| <i>IKZF3</i>    |
| <i>IL23R</i>    |
| <i>IL2RA</i>    |
| <i>IL2RB</i>    |
| <i>IL8</i>      |
| <i>INHBA</i>    |
| <i>INMT</i>     |
| <i>ISM2</i>     |
| <i>ITGB1BP1</i> |
| <i>KCNAB1</i>   |
| <i>KIAA1539</i> |
| <i>KIAA1919</i> |
| <i>KIR2DL1</i>  |
| <i>KLF5</i>     |
| <i>KLK4</i>     |
| <i>KTNI</i>     |
| <i>LEF1</i>     |
| <i>LGR6</i>     |
| <i>LMO3</i>     |
| <i>LRRC17</i>   |

|                 |
|-----------------|
| <i>LRRC26</i>   |
| <i>LRRC32</i>   |
| <i>MADD</i>     |
| <i>MAP6</i>     |
| <i>MEG3</i>     |
| <i>MFAP5</i>    |
| <i>MGC50722</i> |
| <i>MGP</i>      |
| <i>MKI67</i>    |
| <i>MLH3</i>     |
| <i>MMP11</i>    |
| <i>MMP28</i>    |
| <i>MRPL12</i>   |
| <i>MYBL2</i>    |
| <i>MYC</i>      |
| <i>MYOM3</i>    |
| <i>NDP</i>      |
| <i>NFIB</i>     |
| <i>NFYC</i>     |
| <i>NKX3-2</i>   |
| <i>NLRC5</i>    |
| <i>NOMO2</i>    |
| <i>NPIPL1</i>   |
| <i>NPR3</i>     |
| <i>NR6A1</i>    |
| <i>NTSRI</i>    |
| <i>NUP155</i>   |
| <i>OAS2</i>     |
| <i>OGFOD1</i>   |
| <i>OR10H1</i>   |
| <i>OR2T27</i>   |
| <i>P2RY2</i>    |
| <i>PAK4</i>     |
| <i>PAPPA</i>    |
| <i>PAPPAS</i>   |
| <i>PCDHB12</i>  |
| <i>PCDHB13</i>  |
| <i>PDCD10</i>   |
| <i>PDZD3</i>    |
| <i>PGK1</i>     |
| <i>PHF7</i>     |
| <i>PIGR</i>     |
| <i>PLA2G12B</i> |

|                 |
|-----------------|
| <i>PLA2G4C</i>  |
| <i>PLAG1</i>    |
| <i>PLOD2</i>    |
| <i>POU2AF1</i>  |
| <i>PPAPDC2</i>  |
| <i>PPIA</i>     |
| <i>PRAP1</i>    |
| <i>PRND</i>     |
| <i>PROM2</i>    |
| <i>PSMB9</i>    |
| <i>PTGER3</i>   |
| <i>PTPRC</i>    |
| <i>QRICH1</i>   |
| <i>RAB1A</i>    |
| <i>RCC1</i>     |
| <i>RECQL</i>    |
| <i>REV3L</i>    |
| <i>RNASEH1</i>  |
| <i>RNF180</i>   |
| <i>RNF39</i>    |
| <i>ROBO1</i>    |
| <i>RRM2</i>     |
| <i>RUNX1T1</i>  |
| <i>SALL4</i>    |
| <i>SAP18</i>    |
| <i>SDC2</i>     |
| <i>SELL</i>     |
| <i>SERP2</i>    |
| <i>SERPINE1</i> |
| <i>SETBP1</i>   |
| <i>SFRP2</i>    |
| <i>SFXN5</i>    |
| <i>SGK2</i>     |
| <i>SH3PXD2A</i> |
| <i>SHARPIN</i>  |
| <i>SLC2A12</i>  |
| <i>SLC4A4</i>   |
| <i>SLIT2</i>    |
| <i>SMC4</i>     |
| <i>SMOX</i>     |
| <i>SPARC</i>    |
| <i>SPP1</i>     |
| <i>SRPK1</i>    |

|                  |
|------------------|
| <i>SSPN</i>      |
| <i>STC1</i>      |
| <i>STMN2</i>     |
| <i>STX3</i>      |
| <i>SYN1</i>      |
| <i>TACSTD2</i>   |
| <i>TCEAL3</i>    |
| <i>TCF21</i>     |
| <i>TCN2</i>      |
| <i>TFR2</i>      |
| <i>TGFBR3</i>    |
| <i>THSD1P1</i>   |
| <i>TK1</i>       |
| <i>TM4SF1</i>    |
| <i>TMTC1</i>     |
| <i>TNFRSF10D</i> |
| <i>TSHZ2</i>     |
| <i>TSPYL4</i>    |
| <i>TYMS</i>      |
| <i>UBB</i>       |
| <i>UBD</i>       |
| <i>UPK1A</i>     |
| <i>USP10</i>     |
| <i>VCAN</i>      |
| <i>VDAC2</i>     |
| <i>VEPH1</i>     |
| <i>VNN1</i>      |
| <i>WDR27</i>     |
| <i>WNT11</i>     |
| <i>XRCC1</i>     |
| <i>ZBTB39</i>    |
| <i>ZNF135</i>    |
| <i>ZNF174</i>    |
| <i>ZNF205</i>    |
| <i>ZNF449</i>    |
| <i>ZNF451</i>    |
| <i>ZNF471</i>    |
| <i>ZNF576</i>    |
| <i>ZNFNIA3</i>   |

### **eMethods 3. Analytical performance of mRNA expression profile by nCounter**

Dynamic range and limit of detection for the nCounter assay were estimated from synthetic spike-in controls included with every sample. Positive controls are spiked into the reaction at concentrations from 0.125 – 128 fM, representing a fold-change of 1024. Measurements of these controls are highly linear (median  $r^2 = 0.99$  across all discovery samples) in this range. Eight negative control probes, representing sequences not found in the human transcriptome, are also included in each reaction. The lowest positive control, 0.125fM, represents approximately 0.2 copies per cell, and is detected at least 2 standard deviations above the mean of the negative controls. If  $r^2$  for the positive spikes drops below 0.95 or if the 0.125fM spike is not detected 2 standard deviations above the mean of the negative controls, the reaction is considered failed and that sample is repeated or removed from further analysis.

We also tested 11 pairs of samples as duplicate. For these duplicate samples, we calculated the correlation coefficients for the gene expression; the minimum of correlation coefficient was 0.9912, and mean was 0.9925, standard deviation is 0.0021.

To address assay reproducibility and required amount of input RNA, we first performed several samples using 100, 150, 200, and 250ng of total RNA as input. Results are shown for one representative sample in the following figure. The raw data demonstrates an almost linear increase in signal with increased input material. However, normalized data were nearly identical, demonstrating that we can use 100ng of total RNA as starting material for the nCounter assay.

**eFigure 1. Reproducibility of C-07 Sample (C-07-0286R) Measured by nCounter**

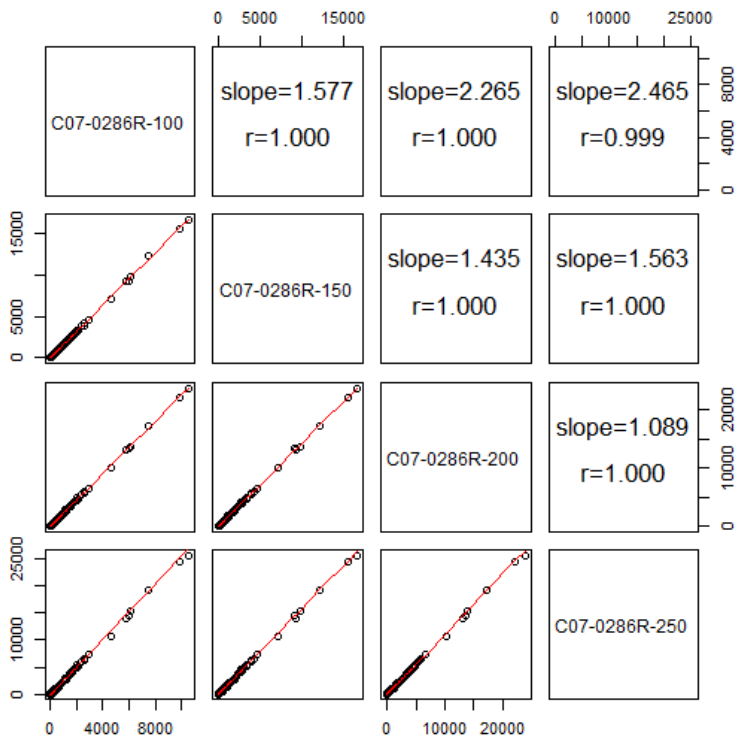

This sample was tested using 100, 150, 200, and 250ng of total RNA as input.



#### eMethods 4. Quality control of the nCounter data

Quality control of the data was performed using default flags in the NSolver software that is provided by the manufacturer:

- 1) Imaging Flag – sample removed if less than  $\frac{3}{4}$  of the expected fields of view are captured by the camera ( $0.75 * 600 = 450$  minimum FOVs)
- 2) Binding Density – sample removed if the binding density falls outside the range 0.05 – 2.25
- 3) Positive Control Flag – sample removed if the positive spikes do not follow the expected linear trend ( $r^2 < 0.95$ )
- 4) 0.5fm Detection Flag – sample removed if the 0.5fm positive control is within two standard deviations of the negative controls
- 5) Tech Normalization Flag – for the raw data,  $\text{median}(\text{sum}(\text{pos}(\text{controls}))/\text{sum}(\text{positive control}))$ ; sample removed if the technological normalization factor  $> 3$  or  $< 0.3$
- 6) Biological Normalization Flag – after adjusted by technical normalization,  $\text{median}(\text{geomean}(\text{pos}(\text{house-keeping controls}))/\text{geomean}(\text{house-keeping control}))$ ; sample removed if the biological normalization factor  $< 0.1$  or  $> 10$ . In this data, *KIAA1539*, *MADD*, *RAB1A*, *C17orf79*, *PDCD10*, *NFYC* were selected as house-keeping genes.
- 7) If repeated measurements for an individual both pass above criteria, the lane with the lesser total counts were be removed.

There were 778 out of 848 samples (91.75%) in the discovery cohort that passed QC, and 825 out of 881 (93.64%) in the validation cohort passed QC. After preprocessing data, we normalized each tumor for technical variability with the sum of the positive controls inherent to the nCounter assay and within sample reference normalized with the geometric mean of 6 internal reference genes (*KIAA1539*, *MADD*, *RAB1A*, *C17orf79*, *PDCD10*, *NFYC*).

**Development of 72-gene Colorectal Cancer Assigner (CRCA) Classifier**

**eTable 4. Centroids for Redeveloped 72-gene Colorectal Cancer Assigner (CRCA) Classifier**

|                 | <b>Enterocyte</b> | <b>Goblet-like</b> | <b>Inflammatory</b> | <b>Stem-like</b> | <b>TA</b> |
|-----------------|-------------------|--------------------|---------------------|------------------|-----------|
| <i>SLC4A4</i>   | 1.099             | 0.1349             | 0.0933              | -0.461           | -0.4826   |
| <i>SFRP2</i>    | -0.2103           | -0.5022            | 0.0497              | 1.0716           | -0.3926   |
| <i>MGP</i>      | 0.0509            | -0.4134            | -0.1745             | 0.8961           | -0.3097   |
| <i>CYP1B1</i>   | -0.3509           | -0.242             | 0.0875              | 0.8449           | -0.3248   |
| <i>FNDC1</i>    | -0.2566           | -0.3827            | -0.0213             | 0.8409           | -0.2125   |
| <i>CXCL13</i>   | 0.11              | -0.2356            | 0.8126              | -0.1015          | -0.4541   |
| <i>MFAP5</i>    | 1.00E-04          | -0.3641            | -0.1964             | 0.8067           | -0.2264   |
| <i>IDO1</i>     | -0.2064           | -0.1664            | 0.7754              | -0.2062          | -0.1969   |
| <i>COMP</i>     | -0.4057           | -0.202             | -0.1175             | 0.7747           | -0.1101   |
| <i>COL11A1</i>  | -0.4436           | -0.3797            | 0.189               | 0.7476           | -0.1898   |
| <i>CXCL9</i>    | -0.2303           | -0.2078            | 0.7334              | -0.006           | -0.2731   |
| <i>CXCL10</i>   | -0.1897           | -0.1776            | 0.7137              | -0.0052          | -0.302    |
| <i>VCAN</i>     | -0.1637           | -0.3038            | -0.0031             | 0.7104           | -0.2344   |
| <i>GBP4</i>     | -0.1999           | -0.1174            | 0.7101              | -0.1899          | -0.1937   |
| <i>FAP</i>      | -0.2881           | -0.2525            | 0.1586              | 0.6969           | -0.301    |
| <i>GBP1</i>     | -0.1684           | -0.2325            | 0.6939              | 0.0308           | -0.2952   |
| <i>BGN</i>      | -0.2625           | -0.3363            | 0.1203              | 0.684            | -0.2285   |
| <i>CXCL11</i>   | -0.203            | -0.115             | 0.6691              | -0.0649          | -0.2545   |
| <i>HSD17B2</i>  | 0.6687            | -0.0054            | 0.1407              | -0.3991          | -0.2153   |
| <i>SPARC</i>    | -0.1227           | -0.3431            | 0.0146              | 0.6662           | -0.218    |
| <i>AKAP12</i>   | -0.1564           | -0.3258            | -1.00E-04           | 0.6652           | -0.1946   |
| <i>INHBA</i>    | -0.3224           | -0.2377            | 0.1021              | 0.6646           | -0.2233   |
| <i>CDKN2B</i>   | 0.6162            | -0.4035            | -0.0118             | 0.222            | -0.2867   |
| <i>C8orf84</i>  | -0.4073           | 0.5791             | -0.0724             | -0.1541          | 0.0682    |
| <i>PTPRC</i>    | 0.0416            | -0.252             | 0.5649              | 0.1694           | -0.4187   |
| <i>FN1</i>      | -0.2859           | -0.4114            | 0.1302              | 0.5476           | -0.0764   |
| <i>SDC2</i>     | -0.0982           | -0.2924            | -0.0399             | 0.5358           | -0.1257   |
| <i>SSPN</i>     | -0.0575           | -0.0801            | -0.1318             | 0.5308           | -0.206    |
| <i>NFIB</i>     | 0.0535            | -0.0317            | -0.5168             | 0.0032           | 0.3672    |
| <i>GRM8</i>     | -0.0273           | -0.1092            | -0.3808             | -0.2021          | 0.5153    |
| <i>PLA2G12B</i> | -0.0591           | -0.2634            | -0.3123             | -0.1001          | 0.5015    |
| <i>PSMB9</i>    | -0.1726           | -0.0019            | 0.4983              | -0.2105          | -0.1072   |
| <i>VNN1</i>     | 0.0753            | 0.2341             | 0.4957              | -0.2096          | -0.4016   |
| <i>DPEP1</i>    | -0.1993           | 0.0196             | -0.4644             | -0.0446          | 0.4881    |
| <i>SGK2</i>     | 0.2445            | -0.2138            | -0.4084             | -0.2707          | 0.4818    |
| <i>CAB39L</i>   | -0.0904           | -0.2837            | -0.4717             | 0.1316           | 0.4798    |
| <i>CPE</i>      | 0.091             | 0.1071             | -0.4766             | 0.2741           | 0.0311    |
| <i>TYMS</i>     | -0.1895           | 0.1904             | 0.4728              | -0.3805          | -0.0701   |

|                   |         |         |         |         |         |
|-------------------|---------|---------|---------|---------|---------|
| <i>MMP11</i>      | -0.1743 | -0.2439 | -0.1581 | 0.462   | 0.0318  |
| <i>PRAP1</i>      | -0.0074 | -0.2188 | -0.4551 | 0.0767  | 0.4181  |
| <i>PIGR</i>       | 0.2984  | 0.2771  | 0.2527  | -0.4536 | -0.2038 |
| <i>GPX3</i>       | 0.0253  | -0.1816 | -0.0432 | 0.4493  | -0.203  |
| <i>OAS2</i>       | -0.1136 | 0.0199  | 0.4392  | -0.0611 | -0.2234 |
| <i>DAPK1</i>      | -0.2495 | 0.3342  | 0.3441  | 0.1757  | -0.4336 |
| <i>SPP1</i>       | -0.3134 | -0.1681 | 0.4032  | 0.4321  | -0.3238 |
| <i>GZMB</i>       | -0.2513 | -0.4275 | 0.3314  | -0.167  | 0.2865  |
| <i>MMP28</i>      | 0.4253  | 0.2425  | 0.1082  | -0.1931 | -0.3441 |
| <i>ID4</i>        | -0.1789 | 0.0325  | -0.2977 | 0.4248  | 0       |
| <i>ERAP2</i>      | -0.0712 | 0.0416  | 0.4002  | -0.1821 | -0.1445 |
| <i>SERPINE1</i>   | -0.1613 | -0.116  | 0.0757  | 0.3678  | -0.1574 |
| <i>EPB41LAB</i>   | 0.1808  | -0.0063 | -0.2888 | -0.3419 | 0.3594  |
| <i>PAPPA</i>      | -0.0641 | -0.2033 | 0.0437  | 0.3593  | -0.1342 |
| <i>POU2AF1</i>    | 0.3543  | 0.2138  | 0.147   | -0.1889 | -0.3155 |
| <i>CKMT2</i>      | 0.0206  | -0.2473 | -0.2254 | -0.0649 | 0.3515  |
| <i>HGD</i>        | 0.2535  | 0.3355  | -0.0656 | -0.3365 | -0.0593 |
| <i>DCBLD2</i>     | -0.2662 | -0.1791 | 0.1036  | 0.335   | -0.0522 |
| <i>IL8</i>        | -0.166  | -0.0459 | 0.3226  | 0.0624  | -0.156  |
| <i>FGL2</i>       | 0.1732  | -0.1883 | 0.3211  | 0.1058  | -0.3093 |
| <i>STC1</i>       | -0.3185 | -0.1163 | 0.2305  | 0.2822  | -0.1135 |
| <i>BHLHE41</i>    | 0.1079  | 0.075   | 0.0015  | 0.2663  | -0.3092 |
| <i>ROBO1</i>      | -0.1221 | -0.2991 | 0.0818  | 0.2661  | -0.0014 |
| <i>PROM2</i>      | 0.2046  | 0.1593  | -0.0655 | -0.2981 | 0.0462  |
| <i>CSGALNACT1</i> | -0.2585 | -0.0478 | -0.0254 | 0.2363  | 0.0324  |
| <i>SELL</i>       | 0.0788  | -0.1222 | 0.2456  | 0.0016  | -0.1589 |
| <i>BMP7</i>       | -0.2046 | -0.0645 | -0.143  | 0.04    | 0.2408  |
| <i>ANKRD44</i>    | 0.0701  | -0.1685 | 0.2335  | 0.0874  | -0.1798 |
| <i>CXCL2</i>      | -0.1416 | 0.0466  | 0.1917  | -0.2284 | 0.0826  |
| <i>HOXA13</i>     | -0.0301 | 0.1091  | -0.0917 | -0.2152 | 0.1795  |
| <i>TACSTD2</i>    | -0.0954 | 0.2113  | -0.0379 | 0.109   | -0.1196 |
| <i>F5</i>         | -0.2002 | 0.0195  | 0.2094  | -0.0196 | -0.03   |
| <i>TM4SF1</i>     | -0.1527 | -0.1754 | -0.0883 | 0.0963  | 0.1938  |
| <i>TGFBR3</i>     | -0.1721 | -0.0829 | -0.016  | 0.04    | 0.1378  |

Abbreviations: TA, transit amplifying.

**eFigure 2. Graphical Presentation of Centroids for Redeveloped 72-gene Colorectal Cancer Assigner (CRCA) Classifier**

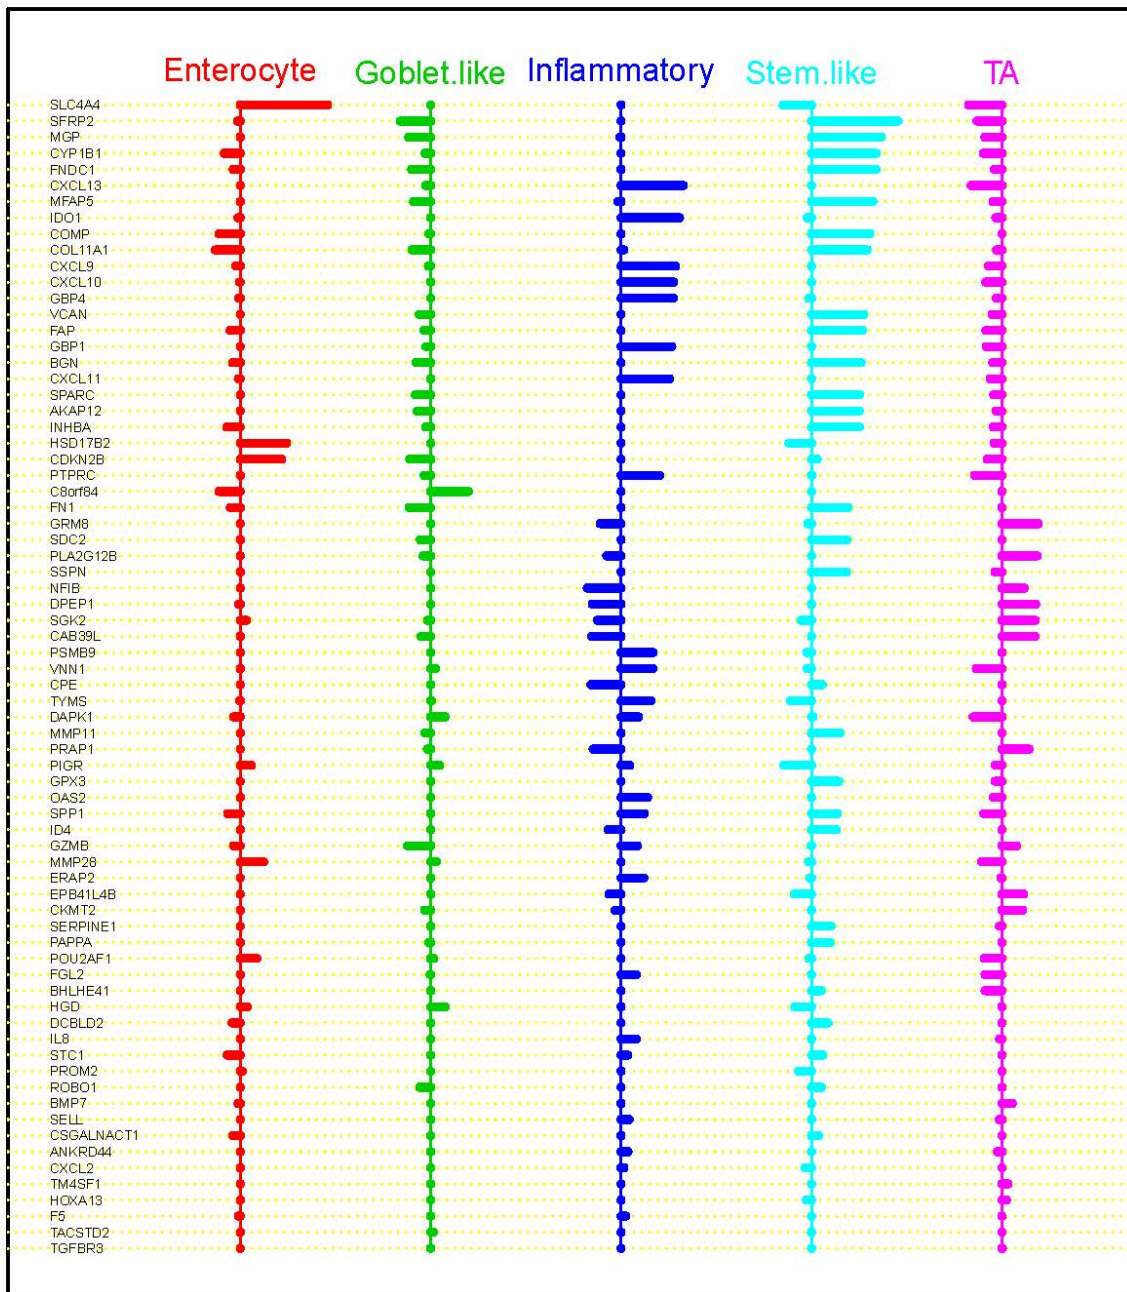

Abbreviations: TA, transit amplifying.

Enterocyte and goblet-like subtype classifier genes are under-represented among 72 genes.

### **eMethods 5. Cross-validation error of redeveloped colorectal cancer assigner classifier**

To evaluate the performance of re-developed colorectal cancer assigner classifier, we used 10-fold cross-validation. Specifically, the core training dataset (N=387), which was used by Sadanandam to develop the original CRCA classifier and used in this study to redevelop the centroid, were randomly divided into 10 approximately equally-sized parts. For each part in turn, the classifier is built on the other 9 parts then tested on the remaining part. Cross-validation error was evaluated by comparing prediction with the original subtype assignment by Sadanandam. Analysis was carried out using the pamr packages implemented in R.

**eTable 5. Cross-Validation Error Rate of Redeveloped 72-gene Colorectal Cancer Assigner (CRCA) Classifier Compared to the Original Subtype Assignment by Sadanandam et al<sup>1</sup>**

|                            | <b>Enterocyte</b> | <b>Goblet-like</b> | <b>Inflammatory</b> | <b>Stem-like</b> | <b>TA</b> | <b>Classification Error Rate</b> |
|----------------------------|-------------------|--------------------|---------------------|------------------|-----------|----------------------------------|
| Enterocyte                 | 46                | 8                  | 6                   | 2                | 2         | 0.285                            |
| Goblet-like                | 1                 | 44                 | 6                   | 6                | 6         | 0.302                            |
| Inflammatory               | 4                 | 1                  | 68                  | 3                | 2         | 0.128                            |
| Stem-like                  | 0                 | 0                  | 3                   | 73               | 1         | 0.052                            |
| TA                         | 1                 | 2                  | 3                   | 4                | 95        | 0.095                            |
| Overall error rate = 0.157 |                   |                    |                     |                  |           |                                  |

Abbreviations: TA, transit amplifying.

## **Development of a 166-gene Colon Cancer Subtypes (CCS) classifier**

### **eMethods 6. Colon Cancer Subtypes (CCS) assignment for C-07 samples**

We redeveloped a classifier using the core training dataset in which the original Colon Cancer Subtypes (CCS) classifier was originally discovered (N=90) because only 10 out of 146 genes in the CCS classifier were included in our nCounter code set (De Sousa, Wang, et al. 2013).<sup>2</sup> We generated the centroid for each subtype using Prediction Analysis of Microarray (PAM) method (Tibshirani, Hastie, et al. 2002).<sup>3</sup> PAM ranks genes using a penalized t-statistic, and identifies a set of genes (n=166) for classification; the number of genes is selected by 10-fold cross validation. The redeveloped centroids of the CCS dataset are shown in **eTable 5**. The analysis was done using pamr packages implemented in R. To predict subtype for a single sample, we calculated the spearman rank correlation between each sample and the value of centroids for each subtype and assigned the sample to the most correlated subtypes.

**eTable 6. Centroid for Redeveloped Colon Cancer Subtypes (CCS) Classifier**

|                 | <b>CCS1</b> | <b>CCS2</b> | <b>CCS3</b> |
|-----------------|-------------|-------------|-------------|
| <i>TYMS</i>     | -0.0984     | 0.5169      | -0.0909     |
| <i>KCNAB1</i>   | -0.0714     | -0.188      | 0.4959      |
| <i>SLIT2</i>    | -0.1298     | -0.0624     | 0.4879      |
| <i>NPR3</i>     | -0.1243     | -0.0646     | 0.4797      |
| <i>SSPN</i>     | -0.0799     | -0.1464     | 0.4734      |
| <i>CRYAB</i>    | -0.1322     | -0.0404     | 0.472       |
| <i>CYP1B1</i>   | -0.251      | 0           | 0.4669      |
| <i>BHLHE41</i>  | -0.203      | 0           | 0.4667      |
| <i>INHBA</i>    | -0.2638     | 0           | 0.4647      |
| <i>ABCC9</i>    | -0.1994     | 0           | 0.4485      |
| <i>MFAP5</i>    | -0.1205     | -0.0341     | 0.4448      |
| <i>CDK14</i>    | -0.23       | 0           | 0.4327      |
| <i>COMP</i>     | -0.0998     | -0.0544     | 0.4256      |
| <i>PTGER3</i>   | -0.0253     | -0.2035     | 0.4255      |
| <i>RUNX1T1</i>  | -0.0126     | -0.2273     | 0.4241      |
| <i>FAP</i>      | -0.2584     | 0           | 0.4224      |
| <i>AKAP12</i>   | -0.1276     | 0           | 0.4198      |
| <i>ANKRD6</i>   | -0.0836     | -0.0787     | 0.418       |
| <i>PRND</i>     | -0.1053     | -0.0347     | 0.4176      |
| <i>SPARC</i>    | -0.1138     | 0           | 0.3982      |
| <i>ACTA2</i>    | -0.0629     | -0.0976     | 0.3974      |
| <i>VCAN</i>     | -0.155      | 0           | 0.3933      |
| <i>ADAMTS5</i>  | -0.1511     | 0           | 0.3877      |
| <i>CALB2</i>    | -0.2368     | 0           | 0.3866      |
| <i>SDC2</i>     | -0.0698     | -0.0699     | 0.3846      |
| <i>CIQTNF3</i>  | -0.0397     | -0.1246     | 0.3796      |
| <i>EXO1</i>     | -0.0728     | 0.3747      | -0.0074     |
| <i>C16orf45</i> | -0.0489     | -0.0985     | 0.3727      |
| <i>TFR2</i>     | -0.1148     | 0.3714      | 0           |
| <i>MGP</i>      | -0.0619     | -0.0663     | 0.367       |
| <i>CPE</i>      | 0           | -0.3537     | 0.3598      |
| <i>MRPL12</i>   | 0.0504      | 0.077       | -0.3557     |
| <i>GADD45B</i>  | -0.1886     | 0           | 0.3519      |
| <i>MYC</i>      | 0.234       | 0           | -0.3508     |
| <i>COL8A1</i>   | -0.1035     | 0           | 0.3501      |
| <i>EPB41LAB</i> | 0.3301      | -0.2997     | -0.1834     |
| <i>BGN</i>      | -0.1726     | 0           | 0.3287      |
| <i>SGK2</i>     | 0.2881      | -0.3267     | -0.0816     |
| <i>STMN2</i>    | 0           | -0.3233     | 0.1973      |
| <i>COL11A1</i>  | -0.1614     | 0           | 0.3216      |
| <i>BST1</i>     | -0.0916     | 0           | 0.3151      |



|                   |         |         |         |
|-------------------|---------|---------|---------|
| <i>MEG3</i>       | -0.0476 | -0.0338 | 0.311   |
| <i>ID4</i>        | 0       | -0.306  | 0.2529  |
| <i>CAB39L</i>     | 0.1237  | -0.3047 | 0       |
| <i>GRM8</i>       | 0.2437  | -0.3031 | -0.0218 |
| <i>SRPK1</i>      | 0.0883  | 0       | -0.3026 |
| <i>SPP1</i>       | -0.2998 | 0.1769  | 0.2403  |
| <i>NFYC</i>       | 0       | 0.2921  | -0.1759 |
| <i>TK1</i>        | 0       | 0.2907  | -0.2069 |
| <i>DAPK1</i>      | -0.2119 | 0       | 0.2866  |
| <i>SETBP1</i>     | -0.0212 | -0.0584 | 0.285   |
| <i>PAK4</i>       | 0.071   | 0       | -0.2837 |
| <i>GPX3</i>       | -0.1314 | 0       | 0.281   |
| <i>SERPINE1</i>   | -0.2553 | 0.0445  | 0.2802  |
| <i>RCC1</i>       | 0       | 0.2792  | -0.0595 |
| <i>STX3</i>       | 0.1651  | 0       | -0.2716 |
| <i>AGPAT5</i>     | 0.0384  | 0.0074  | -0.2699 |
| <i>HJURP</i>      | 0       | 0.2697  | -0.1731 |
| <i>LRRC17</i>     | 0       | -0.0785 | 0.2598  |
| <i>FNI</i>        | -0.0473 | 0       | 0.2578  |
| <i>RRM2</i>       | 0       | 0.2487  | -0.2178 |
| <i>ABCC5</i>      | 0.0534  | -0.2445 | 0       |
| <i>CASP3</i>      | 0       | 0.2392  | -0.1595 |
| <i>PPIA</i>       | 0.1088  | 0       | -0.2344 |
| <i>DCBLD2</i>     | -0.0757 | 0       | 0.2328  |
| <i>LRRC32</i>     | 0       | -0.2257 | 0.2317  |
| <i>ZBTB39</i>     | 0.0693  | 0       | -0.23   |
| <i>MKI67</i>      | 0       | 0.2275  | -0.1438 |
| <i>PIGR</i>       | 0       | 0.0591  | -0.2207 |
| <i>GBP1</i>       | -0.1401 | 0.22    | 0       |
| <i>TNFRSF10D</i>  | 0       | 0.2131  | -0.033  |
| <i>WNT11</i>      | 0.1074  | -0.212  | 0       |
| <i>IL8</i>        | -0.2046 | 0.2104  | 0.0351  |
| <i>TACSTD2</i>    | -0.0463 | 0       | 0.2098  |
| <i>LMO3</i>       | 0       | -0.0811 | 0.2046  |
| <i>DPEP1</i>      | 0.1811  | -0.2044 | 0       |
| <i>CSGALNACT1</i> | -0.0774 | 0       | 0.2039  |
| <i>GNG12</i>      | 0       | -0.2032 | 0.0443  |
| <i>HDAC9</i>      | 0       | -0.0164 | 0.2022  |
| <i>HTRA2</i>      | 0       | 0.1967  | -0.0077 |
| <i>DUSP10</i>     | -0.1443 | 0.1899  | 0       |
| <i>F5</i>         | -0.1898 | 0.0799  | 0.1276  |
| <i>EPB41</i>      | 0       | 0.1185  | -0.1878 |
| <i>SH3PXD2A</i>   | 0       | -0.0673 | 0.1847  |

|                |         |         |         |
|----------------|---------|---------|---------|
| <i>SELL</i>    | -0.1843 | 0.1418  | 0.0608  |
| <i>P2RY2</i>   | 0.1843  | -0.0564 | -0.139  |
| <i>STC1</i>    | -0.1833 | 0.0299  | 0.1615  |
| <i>CDK1</i>    | 0       | 0.1804  | -0.11   |
| <i>QRICH1</i>  | -0.0024 | 0.1802  | 0       |
| <i>CXCL10</i>  | -0.1099 | 0.179   | 0       |
| <i>HNF1B</i>   | 0.0826  | 0       | -0.1784 |
| <i>PSMB9</i>   | 0       | 0.1749  | 0       |
| <i>CNOT7</i>   | 0       | 0.0056  | -0.1727 |
| <i>VDAC2</i>   | 0       | 0.1709  | -0.1112 |
| <i>ABCA3</i>   | -0.0737 | 0.1641  | 0       |
| <i>CXCL9</i>   | -0.0618 | 0.146   | 0       |
| <i>VNN1</i>    | -0.1405 | 0       | 0.1231  |
| <i>PDZD3</i>   | 0.1367  | -0.0991 | -0.0127 |
| <i>TCF21</i>   | 0       | -0.1366 | 0.0047  |
| <i>RNASEH1</i> | 0.0097  | -0.1348 | 0       |
| <i>OAS2</i>    | -0.0955 | 0.1347  | 0       |
| <i>CXCL11</i>  | -0.0518 | 0.1337  | 0       |
| <i>PHF7</i>    | 0       | 0       | -0.1331 |
| <i>CD28</i>    | -0.0939 | 0       | 0.1313  |
| <i>IL2RB</i>   | -0.055  | 0.1269  | 0       |
| <i>MYBL2</i>   | 0.0898  | 0       | -0.1264 |
| <i>CKMT2</i>   | 0.1231  | -0.0215 | -0.0589 |
| <i>HYAL1</i>   | -0.1213 | 0.0994  | 0       |
| <i>PTPRC</i>   | -0.1166 | 0       | 0.0799  |
| <i>DFFB</i>    | 0       | 0.1147  | -0.0626 |
| <i>SMC4</i>    | 0       | 0.1131  | -0.0067 |
| <i>SAP18</i>   | 0.0124  | -0.1084 | 0       |
| <i>REV3L</i>   | -0.1066 | 0.0446  | 0.0074  |
| <i>ZNF576</i>  | 0.1065  | -0.0033 | -0.0451 |
| <i>COL17A1</i> | 0       | -0.1035 | 0       |
| <i>CXCL13</i>  | -0.1022 | 0.0923  | 0       |
| <i>ATP5E</i>   | 0.1018  | -0.0374 | -0.0053 |
| <i>UBB</i>     | -0.0614 | 0.0973  | 0       |
| <i>IGFBP3</i>  | -0.0467 | 0       | 0.0947  |
| <i>ABCC1</i>   | 0.0393  | 0       | -0.0939 |
| <i>CLEC4E</i>  | -0.0928 | 0       | 0.0806  |
| <i>TSPYL4</i>  | 0       | -0.091  | 0.0505  |
| <i>IDO1</i>    | -0.004  | 0.0803  | 0       |
| <i>DLX5</i>    | 0       | 0       | 0.0774  |
| <i>GRB2</i>    | -0.0773 | 0.0452  | 0       |
| <i>ADAM28</i>  | -0.021  | 0       | 0.0754  |
| <i>ABCC2</i>   | 0.0445  | -0.0725 | 0       |

|                |          |          |         |
|----------------|----------|----------|---------|
| <i>BTG1</i>    | -0.0706  | 0        | 0.0409  |
| <i>SLC4A4</i>  | 0        | 0.0694   | 0       |
| <i>PAPPA</i>   | -0.0665  | 0.0275   | 0       |
| <i>MLH3</i>    | -0.0657  | 0        | 0.0143  |
| <i>ASPSCR1</i> | 9.00E-04 | 0        | -0.0649 |
| <i>PLA2G4C</i> | 0        | 0        | 0.0646  |
| <i>ATP7B</i>   | 0.0636   | 0        | 0       |
| <i>CXCL2</i>   | 0        | 0.0596   | -0.062  |
| <i>CD8A</i>    | -0.0608  | 0.0203   | 0       |
| <i>ABCG2</i>   | 0        | 0        | 0.0562  |
| <i>CASP8</i>   | 0.0562   | 0        | -0.0448 |
| <i>BAX</i>     | 0.001    | 0        | -0.0514 |
| <i>IL2RA</i>   | -0.0454  | 0.0478   | 0       |
| <i>ACOT7</i>   | 0        | 0.0477   | -0.0061 |
| <i>NTSR1</i>   | -0.0453  | 0        | 0.0399  |
| <i>TGFBR3</i>  | -0.0444  | 0        | 0.0107  |
| <i>HCG9</i>    | 0        | 0        | 0.0418  |
| <i>RECQL</i>   | 0        | 0        | 0.0392  |
| <i>TCN2</i>    | -0.0379  | 0        | 0       |
| <i>BMP7</i>    | 0        | -0.0371  | 0.0127  |
| <i>MMP28</i>   | -0.0361  | 0        | 0       |
| <i>ERAP2</i>   | -0.0014  | 0.0329   | 0       |
| <i>LEF1</i>    | 0        | 0        | 0.0318  |
| <i>GABRR1</i>  | 0.0289   | 0        | 0       |
| <i>CTLA4</i>   | 0        | 0.0246   | 0       |
| <i>MMP11</i>   | 0        | -0.0241  | 0       |
| <i>CCR7</i>    | -0.0209  | 0        | 0       |
| <i>PLAG1</i>   | 0        | -0.0141  | 0.0204  |
| <i>ZNF205</i>  | 0.0173   | 0        | 0       |
| <i>NFIB</i>    | 0        | 0.0168   | 0       |
| <i>FGL2</i>    | 0        | 0        | 0.0166  |
| <i>ROBO1</i>   | -0.0151  | 0        | 0       |
| <i>PLOD2</i>   | 0        | 0        | 0.0127  |
| <i>NUP155</i>  | 0        | 0        | -0.011  |
| <i>DENND3</i>  | -0.0077  | 0        | 0       |
| <i>CD4</i>     | -0.0064  | 0        | 0       |
| <i>GZMB</i>    | 0        | 0        | -0.0032 |
| <i>EPHB6</i>   | 0        | 0.0017   | 0       |
| <i>HPRT1</i>   | 0        | 9.00E-04 | 0       |

## Statistical Power Analyses

### eMethods 7. Power calculation of oxaliplatin benefit in enterocyte subtype

Logrank test was used to test the null hypothesis and assumes that there is no difference between the clinical outcome for enterocyte patients treated by FULV or FLOX. The test was performed at a 0.05 significance level. The accrual time was 2.8 years and the follow-up time is 10 years. The sample size is 70. We calculated power by varying the Hazard Ratio (HR) (0.2, 0.5), and a control survival proportion at 10 years of (0.5, 0.6). The following figure graphs power versus HR.

### Power of Oxaliplatin Benefit in Patients with the Enterocyte Subtype

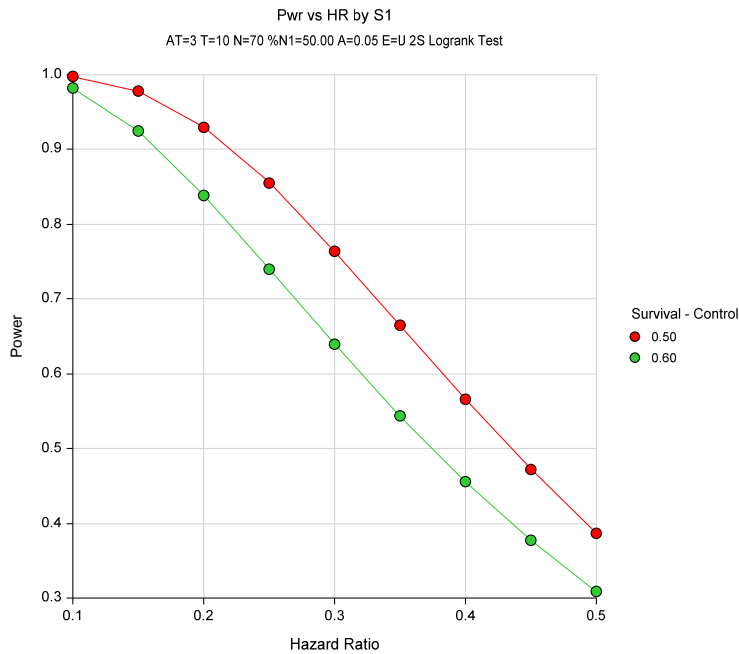

## eMethods 8. Power calculation of enterocyte subtype as predictive biomarker

For the primary aim, enterocyte was classified as a benefit group, and other subtypes were classified as a non-benefit group. We tested the null hypothesis that there is no interaction between treatment and the genomic predictor using a two-arm survival interaction test with the method developed by Peterson and George<sup>4</sup> using the SWOG webtool ([http://www.swogstat.org/stat/public/int\\_survival.htm](http://www.swogstat.org/stat/public/int_survival.htm)).

With the assumption of exponential distribution, the formula for power calculation is as follows:

$$Z_{1-\beta} = \sqrt{N(\log\Delta)^2 / \sum \frac{1}{(e_{ij}f_{ij})}} - Z_{1-\alpha/2}$$

in which N is the sample size;  $f_{ij}$  are the frequencies in treatment  $i$  (FLOX or FULV) in stratum  $j$  (e.g. benefit group or non-benefit group);  $e_{ij}$  are the event probabilities in treatment  $i$  and stratum  $j$ , with the exponential failure assumptions,  $e_{ij}$  is calculated using the accrual, minimum follow-up, competing risk, and the hazard rate  $\lambda_{ij}$  where  $\lambda_{ij}$  represent hazard rate in treatment  $i$  and stratum  $j$ ,  $\lambda_{ij}$  can be inferred from hazard rate  $\lambda_i$  and frequency of genomic predictor ( $f_j$ )  $\lambda_i = \sum \lambda_{ij} * f_j$ , and  $\Delta$  is defined as  $\Delta = \frac{\Delta_1}{\Delta_2} = \frac{\lambda_{11}/\lambda_{21}}{\lambda_{12}/\lambda_{22}}$  (the ratio of hazard ratios). In this analysis, treatment refers to FLOX or FULV, and stratum refers to patients stratified by the predictor. For power consideration, we need to specify variables  $\alpha$ , N,  $f_{ij}$ ,  $\Delta$ , accrual, minimum follow-up, competing risk, and  $\lambda_{ij}$ .

In C-07, accrual time was 2.8 years, minimum follow-up is 10 years, and competing risk hazard of death is 0.0069 deaths per patient-year, the hazard rate for FLOX is 0.0245 and the hazard rate for FULV is 0.0291. In the C-07 validation cohort, 606 stage III patients have been successfully profiled and assigned to subtypes, among them, 70 (12%) are enterocyte, and 536 (88%) belong to other subtypes. We also calculated power by varying  $\lambda_{11}$  and  $\lambda_{21}$  to have the values of (0.020, 0.022, 0.024, 0.026, 0.028, 0.03, 0.032, and 0.034). The following figure shows how the power changes with the differing assumptions with regard to the degree of oxaliplatin benefit in the different groups or specifically in differing values for  $\Delta$  (the ratio of hazard ratio) including HRs for the non-benefit group ranging from 0.9 to 1.1 and HRs for the benefit group ranging from 0.25 to 0.7. In the current validation cohort, the  $\Delta$  was approximately 0.55, resulting in a power of less than 0.4. If the  $\Delta$  had been 0.4, then the power would still have been less than 0.7.

### Power of Detecting a Difference in Benefit from Oxaliplatin in Patients with an Enterocyte Subtype versus Other Subtypes

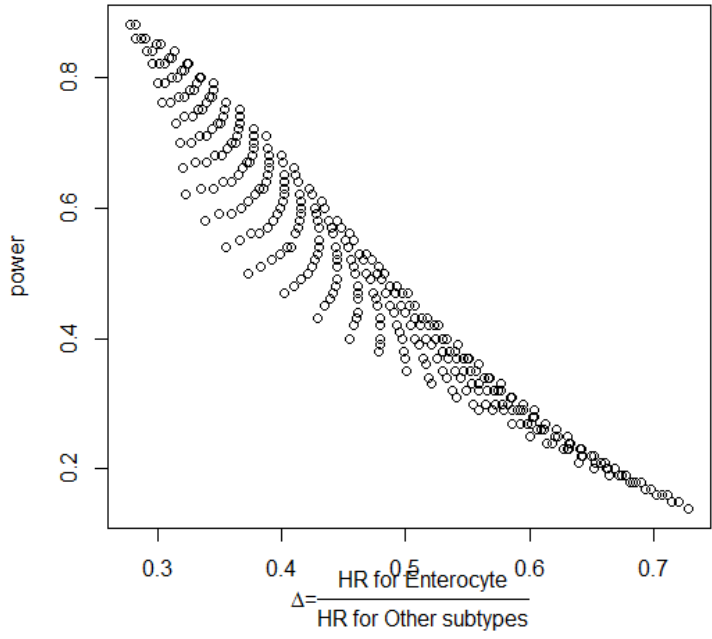

## **Prognostic and Predictive Values of Clinical Variables in the Entire C-07 Cohort**

**eTable 7. Univariate Analysis of Prognostic Value for Clinical Variables in C-07 Entire Dataset**

|             |                | <b>HR</b> | <b>Lower (95%)</b> | <b>Upper (95%)</b> | <b>P Value</b> |
|-------------|----------------|-----------|--------------------|--------------------|----------------|
| Age         | ≥70 vs <70     | 0.96      | 0.75               | 1.23               | 0.741          |
| Gender      | Male vs Female | 0.91      | 0.76               | 1.09               | 0.294          |
| Stage       | III vs II      | 3.19      | 2.42               | 4.20               | 0.000          |
| Grade       | High vs low    | 1.08      | 0.86               | 1.35               | 0.514          |
| Tumor stage | T3 vs T1&T2    | 2.17      | 1.47               | 3.20               | 0.000          |
|             | T4 vs T1&T2    | 3.92      | 2.46               | 6.25               | 0.000          |
| Perforation | Yes vs No      | 1.67      | 1.04               | 2.67               | 0.033          |
| Obstruction | Yes vs No      | 1.38      | 1.11               | 1.71               | 0.003          |

**eFigure 3. Forest Plot of Clinical Variables**

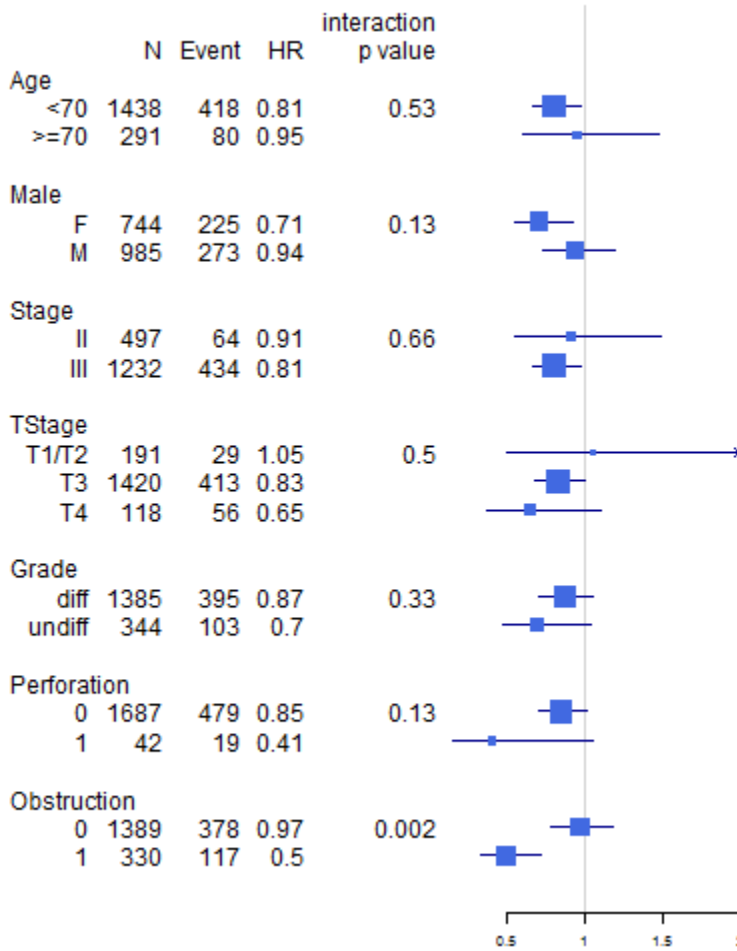

HR <1 indicated that patients receive benefit from oxaliplatin.



### **eResults 1. The NCCN and oxaliplatin benefit in C-07**

NCCN recommended all stage III and high-risk stage II patients with lymphovascular invasion, perforation, obstruction, T4 lesions, less than 12 lymph nodes examined, grade 3-4 lesions, and perineural invasion to be treated with oxaliplatin. However, analysis in the entire C-07 data (including discovery and validation cohort) indicated that the NCCN biomarker is not predictive (interaction HR=1.13, interaction p=0.79), and the gain in high-risk patients are small (HR=0.821, 95% CI: 0.686-0.982) (**eFigure 4**). Furthermore, the NCCN guideline classified 89.6% of the cohort as high risk, and most likely subjected many patients to unnecessary toxic therapy.

**eFigure 4. Recurrence-free survival for NCCN Low-risk (A) and NCCN High-risk (B) Patients in NSABP C-07 (including discovery and validation cohorts) treated with FULV or FLOX (interaction  $p=0.125$ )**

**A.**

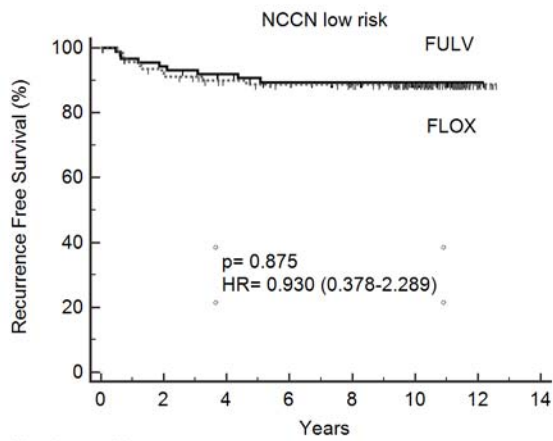

| Number at risk |    |    |    |    |    |    |   |   |
|----------------|----|----|----|----|----|----|---|---|
| Group: FLOX    | 88 | 81 | 76 | 70 | 64 | 48 | 2 | 0 |
| Group: FULV    | 91 | 82 | 74 | 71 | 69 | 52 | 9 | 0 |

**B.**

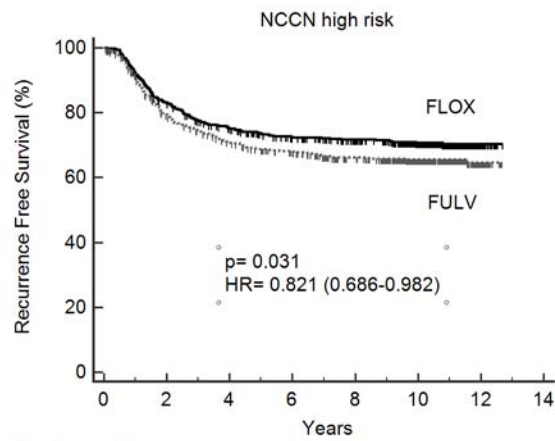

| Number at risk |     |     |     |     |     |     |    |   |
|----------------|-----|-----|-----|-----|-----|-----|----|---|
| Group: FLOX    | 787 | 640 | 561 | 513 | 470 | 344 | 37 | 0 |
| Group: FULV    | 763 | 588 | 513 | 474 | 429 | 298 | 29 | 0 |

**Prognostic and Predictive Values of Subtypes**

**eTable 8. Correspondences between Colorectal Cancer Assigner (CRCA) and Colon Cancer Subtypes (CCS) Classifiers for Samples in Discovery, Validation, and Entire Datasets**

|                | <b>Colorectal cancer</b> | <b>CCS1</b> | <b>CCS2</b> | <b>CCS3</b> |
|----------------|--------------------------|-------------|-------------|-------------|
| Discovery      |                          |             |             |             |
|                | Enterocyte               | 54          | 4           | 33          |
|                | Goblet-like              | 27          | 25          | 11          |
|                | Inflammatory             | 14          | 153         | 35          |
|                | Stem-like                | 11          | 10          | 218         |
|                | TA                       | 152         | 8           | 23          |
| Validation     |                          |             |             |             |
|                | Enterocyte               | 51          | 4           | 38          |
|                | Goblet-like              | 38          | 25          | 16          |
|                | Inflammatory             | 12          | 165         | 26          |
|                | Stem-like                | 13          | 12          | 214         |
|                | TA                       | 177         | 11          | 23          |
| Entire dataset |                          |             |             |             |
|                | Enterocyte               | 105         | 8           | 71          |
|                | Goblet-like              | 65          | 50          | 27          |
|                | Inflammatory             | 26          | 318         | 61          |
|                | Stem-like                | 24          | 22          | 432         |
|                | TA                       | 329         | 19          | 46          |

Abbreviations: TA, transit amplifying.

**eTable 9. Distribution of Colorectal Cancer Assigner (CRCA) Subtypes with Clinical and Pathological Variables in Discovery, Validation, and Entire Datasets**

|                         | Enterocyte | Goblet-like | Inflammatory | Stem-like   | Transit-Amplifying | P Value <sup>a</sup> |
|-------------------------|------------|-------------|--------------|-------------|--------------------|----------------------|
| <b>Discovery Cohort</b> |            |             |              |             |                    |                      |
| Gender                  |            |             |              |             |                    |                      |
| Female                  | 43 (47.3%) | 22 (34.9%)  | 89 (44.1%)   | 95 (39.7%)  | 79 (43.2%)         | 0.51                 |
| Male                    | 48 (52.7%) | 41 (65.1%)  | 113 (55.9%)  | 144 (60.3%) | 104 (56.8%)        |                      |
| Stage                   |            |             |              |             |                    |                      |
| II                      | 26 (28.6%) | 20 (31.7%)  | 88 (43.6%)   | 57 (23.8%)  | 42 (23%)           | 0                    |
| III                     | 65 (71.4%) | 43 (68.3%)  | 114 (56.4%)  | 182 (76.2%) | 141 (77%)          |                      |
| Grade                   |            |             |              |             |                    |                      |
| Differentiated          | 80 (87.9%) | 51 (81%)    | 126 (62.4%)  | 194 (81.2%) | 168 (91.8%)        | 0                    |
| Undifferentiated        | 11 (12.1%) | 12 (19%)    | 76 (37.6%)   | 45 (18.8%)  | 15 (8.2%)          |                      |
| Tumor stage             |            |             |              |             |                    |                      |
| T1                      | 3 (3.3%)   | 3 (4.8%)    | 2 (1%)       | 1 (0.4%)    | 3 (1.6%)           | 0                    |
| T2                      | 12 (13.2%) | 8 (12.7%)   | 15 (7.4%)    | 6 (2.5%)    | 25 (13.7%)         |                      |
| T3                      | 71 (78%)   | 46 (73%)    | 176 (87.1%)  | 213 (89.1%) | 144 (78.7%)        |                      |
| T4                      | 5 (5.5%)   | 6 (9.5%)    | 9 (4.5%)     | 19 (7.9%)   | 11 (6%)            |                      |
| Perforation             |            |             |              |             |                    |                      |
| No                      | 89 (97.8%) | 62 (98.4%)  | 196 (97%)    | 231 (96.7%) | 179 (97.8%)        | 0.91                 |
| Yes                     | 2 (2.2%)   | 1 (1.6%)    | 6 (3%)       | 8 (3.3%)    | 4 (2.2%)           |                      |
| Obstruction             |            |             |              |             |                    |                      |
| No                      | 77 (85.6%) | 54 (85.7%)  | 177 (88.1%)  | 174 (74%)   | 158 (86.3%)        | 0                    |
| Yes                     | 13 (14.4%) | 9 (14.3%)   | 24 (11.9%)   | 61 (26%)    | 25 (13.7%)         |                      |
| Nodes positive          |            |             |              |             |                    |                      |
| 0                       | 26 (28.6%) | 20 (31.7%)  | 88 (43.6%)   | 57 (23.8%)  | 42 (23%)           | 0                    |
| 1-3                     | 43 (47.3%) | 32 (50.8%)  | 78 (38.6%)   | 107 (44.8%) | 108 (59%)          |                      |
| 4+                      | 22 (24.2%) | 11 (17.5%)  | 36 (17.8%)   | 75 (31.4%)  | 33 (18%)           |                      |
| dMMR                    |            |             |              |             |                    |                      |
| pMMR                    | 77 (100%)  | 50 (87.7%)  | 131 (72.4%)  | 193 (94.1%) | 162 (97.6%)        | 0                    |
| dMMR                    | 0 (0%)     | 7 (12.3%)   | 50 (27.6%)   | 12 (5.9%)   | 4 (2.4%)           |                      |
| <i>BRAF</i>             |            |             |              |             |                    |                      |
| Wild type               | 83 (91.2%) | 48 (78.7%)  | 145 (72.9%)  | 205 (86.1%) | 177 (96.7%)        | 0                    |

|                          |            |            |             |             |             |      |
|--------------------------|------------|------------|-------------|-------------|-------------|------|
| Mutant                   | 8 (8.8%)   | 13 (21.3%) | 54 (27.1%)  | 33 (13.9%)  | 6 (3.3%)    |      |
| <i>KRAS</i>              |            |            |             |             |             |      |
| Wild type                | 64 (71.9%) | 26 (44.1%) | 129 (66.8%) | 126 (54.1%) | 121 (66.9%) | 0    |
| Mutant                   | 25 (28.1%) | 33 (55.9%) | 64 (33.2%)  | 107 (45.9%) | 60 (33.1%)  |      |
| <i>MET</i>               |            |            |             |             |             |      |
| Wild type                | 85 (96.6%) | 56 (94.9%) | 184 (95.3%) | 227 (97.4%) | 174 (96.1%) | 0.8  |
| Mutant                   | 3 (3.4%)   | 3 (5.1%)   | 9 (4.7%)    | 6 (2.6%)    | 7 (3.9%)    |      |
| <i>NRAS</i>              |            |            |             |             |             |      |
| Wild type                | 85 (96.6%) | 56 (94.9%) | 190 (99%)   | 226 (97%)   | 176 (97.2%) | 0.46 |
| Mutant                   | 3 (3.4%)   | 3 (5.1%)   | 2 (1%)      | 7 (3%)      | 5 (2.8%)    |      |
| <i>PIK3CA</i>            |            |            |             |             |             |      |
| Wild type                | 74 (84.1%) | 46 (76.7%) | 142 (73.2%) | 175 (74.8%) | 158 (87.3%) | 0    |
| Mutant                   | 14 (15.9%) | 14 (23.3%) | 52 (26.8%)  | 59 (25.2%)  | 23 (12.7%)  |      |
| RFS                      |            |            |             |             |             |      |
| Censored                 | 59 (64.8%) | 47 (74.6%) | 173 (85.6%) | 141 (59%)   | 132 (72.1%) | 0    |
| Event                    | 32 (35.2%) | 16 (25.4%) | 29 (14.4%)  | 98 (41%)    | 51 (27.9%)  |      |
| <b>Validation Cohort</b> |            |            |             |             |             |      |
| Gender                   |            |            |             |             |             |      |
| Female                   | 42 (45.2%) | 35 (44.3%) | 93 (45.8%)  | 104 (43.5%) | 90 (42.7%)  | 0.97 |
| Male                     | 51 (54.8%) | 44 (55.7%) | 110 (54.2%) | 135 (56.5%) | 121 (57.3%) |      |
| Stage                    |            |            |             |             |             |      |
| II                       | 23 (24.7%) | 19 (24.1%) | 78 (38.4%)  | 54 (22.6%)  | 45 (21.3%)  | 0    |
| III                      | 70 (75.3%) | 60 (75.9%) | 125 (61.6%) | 185 (77.4%) | 166 (78.7%) |      |
| Grade                    |            |            |             |             |             |      |
| Differentiated           | 76 (81.7%) | 67 (84.8%) | 137 (67.5%) | 188 (78.7%) | 190 (90%)   | 0    |
| Undifferentiated         | 17 (18.3%) | 12 (15.2%) | 66 (32.5%)  | 51 (21.3%)  | 21 (10%)    |      |
| Tumor stage              |            |            |             |             |             |      |
| T1                       | 7 (7.5%)   | 5 (6.3%)   | 2 (1%)      | 0 (0%)      | 4 (1.9%)    | 0    |
| T2                       | 9 (9.7%)   | 17 (21.5%) | 18 (8.9%)   | 10 (4.2%)   | 26 (12.3%)  |      |
| T3                       | 73 (78.5%) | 50 (63.3%) | 171 (84.2%) | 203 (84.9%) | 169 (80.1%) |      |
| T4                       | 4 (4.3%)   | 7 (8.9%)   | 12 (5.9%)   | 26 (10.9%)  | 12 (5.7%)   |      |
| Perforation              |            |            |             |             |             |      |
| No                       | 90 (96.8%) | 76 (96.2%) | 201 (99%)   | 233         | 205 (97.2%) | 0.59 |

|                     |            |            |             |             |             |      |
|---------------------|------------|------------|-------------|-------------|-------------|------|
|                     |            |            |             | (97.5%)     |             |      |
| Yes                 | 3 (3.2%)   | 3 (3.8%)   | 2 (1%)      | 6 (2.5%)    | 6 (2.8%)    |      |
| Obstruction         |            |            |             |             |             |      |
| No                  | 78 (83.9%) | 66 (83.5%) | 172 (85.1%) | 158 (66.1%) | 171 (82.2%) | 0    |
| Yes                 | 15 (16.1%) | 13 (16.5%) | 30 (14.9%)  | 81 (33.9%)  | 37 (17.8%)  |      |
| Nodes positive      |            |            |             |             |             |      |
| 0                   | 23 (24.7%) | 19 (24.1%) | 78 (38.4%)  | 54 (22.6%)  | 45 (21.3)   | 0    |
| 1-3                 | 47 (50.5%) | 34 (43%)   | 78 (38.4%)  | 104 (43.5%) | 113 (53.6%) |      |
| 4+                  | 23 (24.7%) | 26 (32.9%) | 47 (23.2%)  | 81 (33.9%)  | 53 (25.1%)  |      |
| dMMR                |            |            |             |             |             |      |
| pMMR                | 61 (96.8%) | 48 (85.7%) | 93 (61.6%)  | 157 (95.2%) | 161 (98.2%) | 0    |
| dMMR                | 2 (3.2%)   | 7 (12.5%)  | 58 (38.4%)  | 8 (4.8%)    | 3 (1.8%)    |      |
|                     | 0 (0%)     | 1 (1.8%)   | 0 (0%)      | 0 (0%)      | 0 (0%)      |      |
| <i>BRAF</i>         |            |            |             |             |             |      |
| Wild type           | 78 (90.7%) | 54 (79.4%) | 131 (70.8%) | 192 (87.7%) | 180 (96.8%) | 0    |
| Mutant              | 8 (9.3%)   | 14 (20.6%) | 54 (29.2%)  | 27 (12.3%)  | 6 (3.2%)    |      |
| <i>KRAS</i>         |            |            |             |             |             |      |
| Wild type           | 46 (63%)   | 32 (54.2%) | 111 (70.3%) | 110 (56.7%) | 104 (63.8%) | 0.07 |
| Mutant              | 27 (37%)   | 27 (45.8%) | 47 (29.7%)  | 84 (43.3%)  | 59 (36.2%)  |      |
| <i>MET</i>          |            |            |             |             |             |      |
| Wild type           | 75 (100%)  | 59 (100%)  | 155 (95.7%) | 182 (95.3%) | 161 (97%)   | 0.17 |
| Mutant              | 0 (0%)     | 0 (0%)     | 7 (4.3%)    | 9 (4.7%)    | 5 (3%)      |      |
| <i>NRAS</i>         |            |            |             |             |             |      |
| Wild type           | 69 (97.2%) | 52 (98.1%) | 153 (98.7%) | 183 (96.3%) | 154 (96.9%) | 0.71 |
| Mutant              | 2 (2.8%)   | 1 (1.9%)   | 2 (1.3%)    | 7 (3.7%)    | 5 (3.1%)    |      |
| <i>PIK3CA</i>       |            |            |             |             |             |      |
| Wild type           | 67 (93.1%) | 38 (64.4%) | 123 (75.9%) | 160 (82.9%) | 146 (88%)   | 0    |
| Mutant              | 5 (6.9%)   | 21 (35.6%) | 39 (24.1%)  | 33 (17.1%)  | 20 (12%)    |      |
| RFS                 |            |            |             |             |             |      |
| Censored            | 68 (73.1%) | 51 (64.6%) | 171 (84.2%) | 142 (59.4%) | 153 (72.5%) | 0    |
| Event               | 25 (26.9%) | 28 (35.4%) | 32 (15.8%)  | 97 (40.6%)  | 58 (27.5%)  |      |
| <b>All Patients</b> |            |            |             |             |             |      |
| Gender              |            |            |             |             |             |      |
| Female              | 85         | 57 (40.1%) | 182 (44.9%) | 199         | 169 (42.9%) | 0.7  |

|                  |                |                |             |                |             |      |
|------------------|----------------|----------------|-------------|----------------|-------------|------|
|                  | (46.2%)        |                |             | (41.6%)        |             |      |
| Male             | 99<br>(53.8%)  | 85 (59.9%)     | 223 (55.1%) | 279<br>(58.4%) | 225 (57.1%) |      |
| Stage            |                |                |             |                |             |      |
| II               | 49<br>(26.6%)  | 39 (27.5%)     | 166 (41%)   | 111<br>(23.2%) | 87 (22.1%)  | 0    |
| III              | 135<br>(73.4%) | 103<br>(72.5%) | 239 (59%)   | 367<br>(76.8%) | 307 (77.9%) |      |
| Grade            |                |                |             |                |             |      |
| Differentiated   | 156<br>(84.8%) | 118<br>(83.1%) | 263 (64.9%) | 382<br>(79.9%) | 358 (90.9%) | 0    |
| Undifferentiated | 28<br>(15.2%)  | 24 (16.9%)     | 142 (35.1%) | 96 (20.1%)     | 36 (9.1%)   |      |
| Tumor Stage      |                |                |             |                |             |      |
| T1               | 10 (5.4%)      | 8 (5.6%)       | 4 (1%)      | 1 (0.2%)       | 7 (1.8%)    | 0    |
| T2               | 21<br>(11.4%)  | 25 (17.6%)     | 33 (8.1%)   | 16 (3.3%)      | 51 (12.9%)  |      |
| T3               | 144<br>(78.3%) | 96 (67.6%)     | 347 (85.7%) | 416 (87%)      | 313 (79.4%) |      |
| T4               | 9 (4.9%)       | 13 (9.2%)      | 21 (5.2%)   | 45 (9.4%)      | 23 (5.8%)   |      |
| Perforation      |                |                |             |                |             |      |
| No               | 179<br>(97.3%) | 138<br>(97.2%) | 397 (98%)   | 464<br>(97.1%) | 384 (97.5%) | 0.93 |
| Yes              | 5 (2.7%)       | 4 (2.8%)       | 8 (2%)      | 14 (2.9%)      | 10 (2.5%)   |      |
| Obstruction      |                |                |             |                |             |      |
| No               | 155<br>(84.7%) | 120<br>(84.5%) | 349 (86.6%) | 332 (70%)      | 329 (84.1%) | 0    |
| Yes              | 28<br>(15.3%)  | 22 (15.5%)     | 54 (13.4%)  | 142 (30%)      | 62 (15.9%)  |      |
| Nodes positive   |                |                |             |                |             |      |
| 0                | 49<br>(26.6%)  | 39 (27.5%)     | 166 (41%)   | 111<br>(23.2%) | 87 (22.1%)  | 0    |
| 1-3              | 90<br>(48.9%)  | 66 (46.5%)     | 156 (38.5%) | 211<br>(44.1%) | 221 (56.1%) |      |
| 4+               | 45<br>(24.5%)  | 37 (26.1%)     | 83 (20.5%)  | 156<br>(32.6%) | 86 (21.8%)  |      |
| dMMR             |                |                |             |                |             |      |
| pMMR             | 138<br>(98.6%) | 98 (86.7%)     | 224 (67.5%) | 350<br>(94.6%) | 323 (97.9%) | 0    |
| dMMR             | 2 (1.4%)       | 14 (12.4%)     | 108 (32.5%) | 20 (5.4%)      | 7 (2.1%)    |      |
| NA               | 0 (0%)         | 1 (0.9%)       | 0 (0%)      | 0 (0%)         | 0 (0%)      |      |
| <i>BRAF</i>      |                |                |             |                |             |      |
| Wild type        | 161<br>(91%)   | 102<br>(79.1%) | 276 (71.9%) | 397<br>(86.9%) | 357 (96.7%) | 0    |

|               |                |                |             |                |             |      |
|---------------|----------------|----------------|-------------|----------------|-------------|------|
| Mutant        | 16 (9%)        | 27 (20.9%)     | 108 (28.1%) | 60 (13.1%)     | 12 (3.3%)   |      |
| <i>KRAS</i>   |                |                |             |                |             |      |
| Wild type     | 110<br>(67.9%) | 58 (49.2%)     | 240 (68.4%) | 236<br>(55.3%) | 225 (65.4%) | 0    |
| Mutant        | 52<br>(32.1%)  | 60 (50.8%)     | 111 (31.6%) | 191<br>(44.7%) | 119 (34.6%) |      |
| <i>MET</i>    |                |                |             |                |             |      |
| Wild type     | 160<br>(98.2%) | 115<br>(97.5%) | 339 (95.5%) | 409<br>(96.5%) | 335 (96.5%) | 0.6  |
| Mutant        | 3 (1.8%)       | 3 (2.5%)       | 16 (4.5%)   | 15 (3.5%)      | 12 (3.5%)   |      |
| <i>NRAS</i>   |                |                |             |                |             |      |
| Wild type     | 154<br>(96.9%) | 108<br>(96.4%) | 343 (98.8%) | 409<br>(96.7%) | 330 (97.1%) | 0.37 |
| Mutant        | 5 (3.1%)       | 4 (3.6%)       | 4 (1.2%)    | 14 (3.3%)      | 10 (2.9%)   |      |
| <i>PIK3CA</i> |                |                |             |                |             |      |
| Wild type     | 141<br>(88.1%) | 84 (70.6%)     | 265 (74.4%) | 335<br>(78.5%) | 304 (87.6%) | 0    |
| Mutant        | 19<br>(11.9%)  | 35 (29.4%)     | 91 (25.6%)  | 92 (21.5%)     | 43 (12.4%)  |      |
| RFS           |                |                |             |                |             |      |
| Censored      | 127<br>(69%)   | 98 (69%)       | 344 (84.9%) | 283<br>(59.2%) | 285 (72.3%) | 0    |
| Event         | 57 (31%)       | 44 (31%)       | 61 (15.1%)  | 195<br>(40.8%) | 109 (27.7%) |      |

<sup>a</sup>P Value: Associations of clinical and pathological features variable with subtypes were analyzed by the chi-square test without correcting for missing values.

Abbreviations: MMR, mismatch repair status; pMMR, proficient MMR; dMMR, deficient MMR.



**eFigure 5. Recurrence-free Survival for Colorectal Cancer Assigner subtypes (CRCA) and Colon Cancer Subtypes (CCS) in the Discovery Cohort**

**A.**

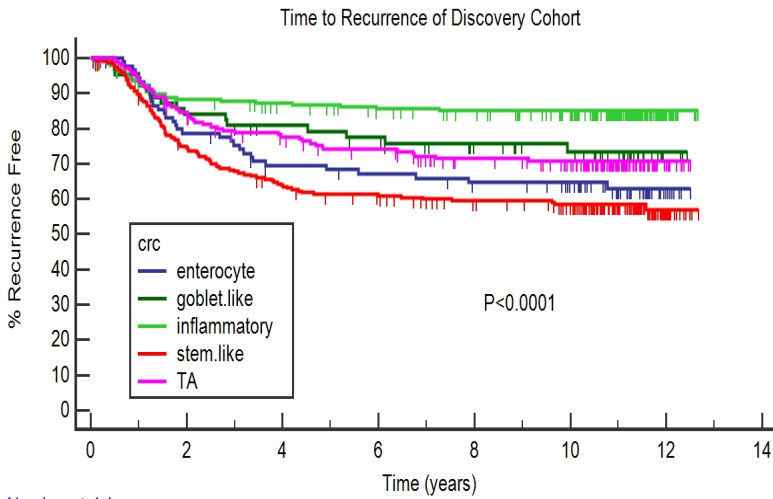

Number at risk

|                     |     |     |     |     |     |     |    |   |
|---------------------|-----|-----|-----|-----|-----|-----|----|---|
| Group: enterocyte   | 91  | 70  | 59  | 56  | 52  | 46  | 7  | 0 |
| Group: goblet.like  | 63  | 53  | 47  | 44  | 36  | 31  | 3  | 0 |
| Group: inflammatory | 202 | 170 | 161 | 151 | 144 | 128 | 16 | 0 |
| Group: stem.like    | 239 | 175 | 148 | 137 | 124 | 111 | 15 | 0 |
| Group: TA           | 183 | 150 | 132 | 122 | 106 | 93  | 10 | 0 |

**B.**

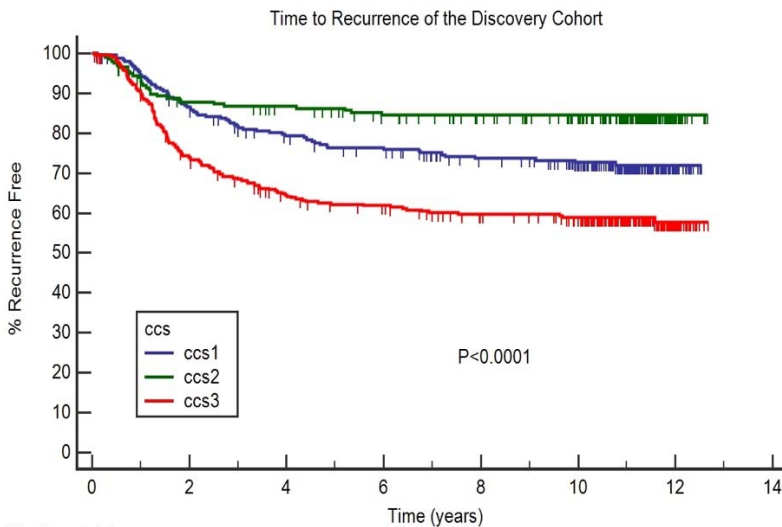

Number at risk

|             |     |     |     |     |     |     |    |   |
|-------------|-----|-----|-----|-----|-----|-----|----|---|
| Group: ccs1 | 258 | 217 | 191 | 179 | 159 | 139 | 18 | 0 |
| Group: ccs2 | 200 | 170 | 163 | 151 | 140 | 122 | 14 | 0 |
| Group: ccs3 | 320 | 231 | 193 | 180 | 163 | 148 | 19 | 0 |

**eTable 10. Univariate and Multivariable Cox Model for Colorectal Cancer Assigner (CRCA) Subtype Prognostic Value in Discovery Cohort**

|               |                           | Univariate Analysis |             |             |         | Multivariate Analysis |             |             |         |
|---------------|---------------------------|---------------------|-------------|-------------|---------|-----------------------|-------------|-------------|---------|
|               |                           | HR                  | Lower (95%) | Upper (95%) | P Value | HR                    | Lower (95%) | Upper (95%) | P Value |
| Age           | >70 vs <70                | 1.00                | 0.71        | 1.41        | 0.986   | 1.05                  | 0.74        | 1.48        | 0.781   |
| Gender        | Male vs Female            | 0.85                | 0.65        | 1.10        | 0.207   | 0.88                  | 0.68        | 1.15        | 0.359   |
| Stage         | III vs II                 | 3.39                | 2.29        | 5.00        | 0.000   | 3.36                  | 2.26        | 4.99        | 0.000   |
| Grade         | High vs low               | 1.03                | 0.74        | 1.43        | 0.854   | 1.10                  | 0.78        | 1.55        | 0.575   |
| Tumor stage   | T3 vs T1&T2               | 1.77                | 1.03        | 3.04        | 0.040   | 2.09                  | 1.20        | 3.66        | 0.010   |
|               | T4 vs T1&T2               | 4.42                | 2.33        | 8.41        | 0.000   | 4.54                  | 2.31        | 8.91        | 0.000   |
| Perforation   | Yes vs No                 | 2.20                | 1.20        | 4.04        | 0.011   | 1.48                  | 0.78        | 2.82        | 0.229   |
| Obstruction   | Yes vs No                 | 1.41                | 1.02        | 1.94        | 0.037   | 1.24                  | 0.89        | 1.72        | 0.214   |
| CRCA subtypes | Enterocyte vs Stem-like   | 0.81                | 0.55        | 1.21        | 0.311   | 0.96                  | 0.64        | 1.44        | 0.840   |
|               | Goblet-like vs Stem-like  | 0.56                | 0.33        | 0.95        | 0.031   | 0.69                  | 0.40        | 1.18        | 0.172   |
|               | Inflammatory vs Stem-like | 0.31                | 0.21        | 0.47        | 0.000   | 0.41                  | 0.27        | 0.64        | 0.000   |
|               | TA vs Stem-like           | 0.63                | 0.45        | 0.88        | 0.007   | 0.71                  | 0.50        | 1.01        | 0.056   |

Abbreviations: TA, transit amplifying.

**eTable 11. Univariate and Multivariable Cox model for Colon Cancer Subtypes (CCS) subtype Prognostic Value in Discovery Cohort**

|             |                | Univariate Analysis |             |             |         | Multivariate Analysis |             |             |         |
|-------------|----------------|---------------------|-------------|-------------|---------|-----------------------|-------------|-------------|---------|
|             |                | HR                  | Lower (95%) | Upper (95%) | P Value | HR                    | Lower (95%) | Upper (95%) | P Value |
| Age         | >70 vs <70     | 1.00                | 0.71        | 1.41        | 0.986   | 1.03                  | 0.73        | 1.45        | 0.882   |
| Gender      | Male vs Female | 0.85                | 0.65        | 1.10        | 0.207   | 0.90                  | 0.69        | 1.18        | 0.446   |
| Stage       | III vs II      | 3.39                | 2.29        | 5.00        | 0.000   | 3.30                  | 2.22        | 4.90        | 0.000   |
| Grade       | High vs Low    | 1.03                | 0.74        | 1.43        | 0.854   | 1.08                  | 0.77        | 1.52        | 0.654   |
| Tumor stage | T3 vs T1&T2    | 1.77                | 1.03        | 3.04        | 0.040   | 2.11                  | 1.21        | 3.69        | 0.009   |
|             | T4 vs T1&T2    | 4.42                | 2.33        | 8.41        | 0.000   | 4.86                  | 2.47        | 9.58        | 0.000   |
| Perforation | Yes vs No      | 2.20                | 1.20        | 4.04        | 0.011   | 1.48                  | 0.78        | 2.80        | 0.230   |
| Obstruction | Yes vs No      | 1.41                | 1.02        | 1.94        | 0.037   | 1.18                  | 0.84        | 1.64        | 0.342   |
| CCS         | CCS1 vs CCS3   | 0.59                | 0.44        | 0.79        | 0.000   | 0.72                  | 0.53        | 0.98        | 0.036   |
|             | CCS2 vs CC3    | 0.33                | 0.22        | 0.49        | 0.000   | 0.42                  | 0.28        | 0.64        | 0.000   |

**eFigure 6. Recurrence-free Survival for Colon Cancer Subtypes (CCS) and Colorectal Cancer Assigner (CRCA) Subtypes in the Discovery Cohort Treated with FULV and FLOX**

**A.**

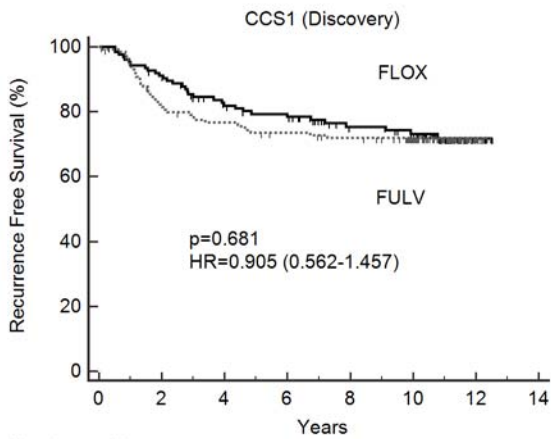

| Number at risk |     | 0   | 2  | 4  | 6  | 8  | 10 | 12 | 14 |
|----------------|-----|-----|----|----|----|----|----|----|----|
| FLOX           | 125 | 112 | 94 | 88 | 72 | 65 | 9  | 0  |    |
| FULV           | 133 | 105 | 97 | 91 | 87 | 74 | 9  | 0  |    |

**B.**

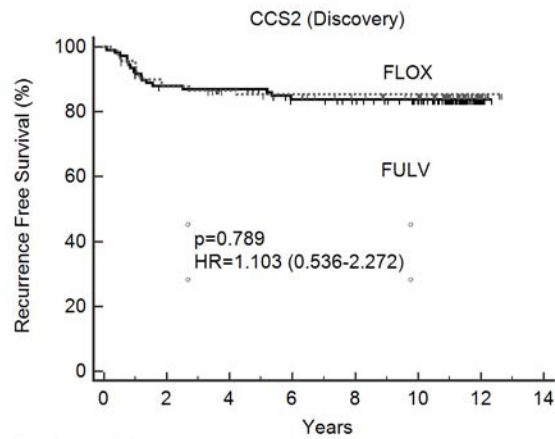

| Number at risk |     | 0  | 2  | 4  | 6  | 8  | 10 | 12 | 14 |
|----------------|-----|----|----|----|----|----|----|----|----|
| FLOX           | 109 | 92 | 89 | 79 | 74 | 64 | 6  | 0  |    |
| FULV           | 91  | 78 | 74 | 72 | 66 | 58 | 8  | 0  |    |

**C.**

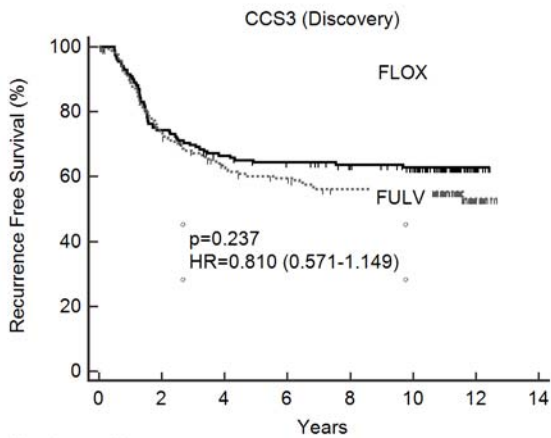

| Number at risk |     | 0   | 2  | 4  | 6  | 8  | 10 | 12 | 14 |
|----------------|-----|-----|----|----|----|----|----|----|----|
| FLOX           | 155 | 113 | 97 | 91 | 83 | 73 | 7  | 0  |    |
| FULV           | 165 | 118 | 96 | 89 | 80 | 75 | 12 | 0  |    |

**D.**

**E.**

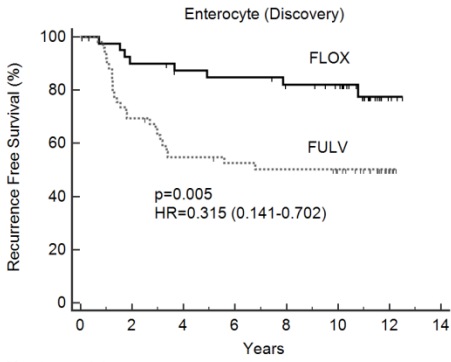

Number at risk

|      |    |    |    |    |    |    |   |   |
|------|----|----|----|----|----|----|---|---|
| FLOX | 42 | 36 | 33 | 32 | 29 | 26 | 3 | 0 |
| FULV | 49 | 34 | 26 | 24 | 23 | 20 | 4 | 0 |

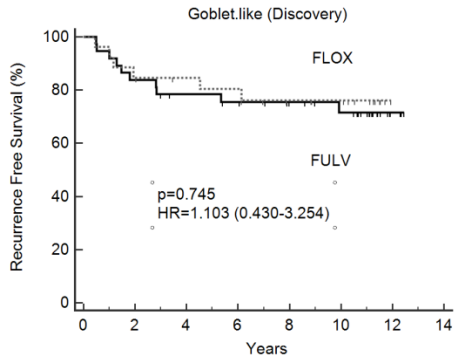

Number at risk

|      |    |    |    |    |    |    |   |   |
|------|----|----|----|----|----|----|---|---|
| FLOX | 37 | 31 | 27 | 25 | 21 | 18 | 3 | 0 |
| FULV | 26 | 22 | 20 | 19 | 15 | 13 | 0 | 0 |

**F.**

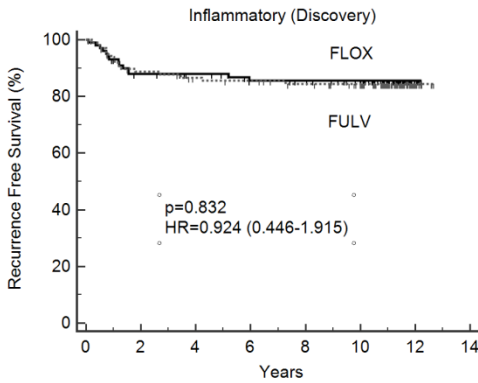

Number at risk

|      |     |    |    |    |    |    |    |   |
|------|-----|----|----|----|----|----|----|---|
| FLOX | 101 | 85 | 81 | 73 | 71 | 63 | 6  | 0 |
| FULV | 101 | 85 | 80 | 78 | 73 | 65 | 10 | 0 |

**G.**

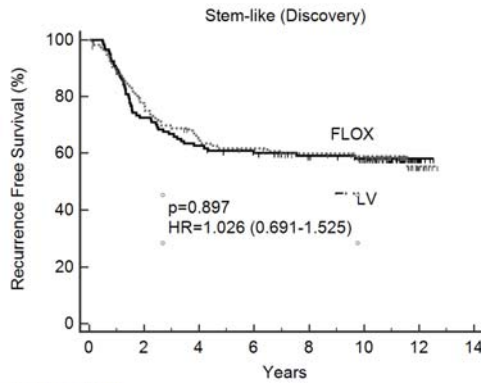

Number at risk

|      |     |    |    |    |    |    |   |   |
|------|-----|----|----|----|----|----|---|---|
| FLOX | 122 | 87 | 75 | 69 | 62 | 55 | 7 | 0 |
| FULV | 117 | 88 | 73 | 68 | 62 | 56 | 8 | 0 |

**H**

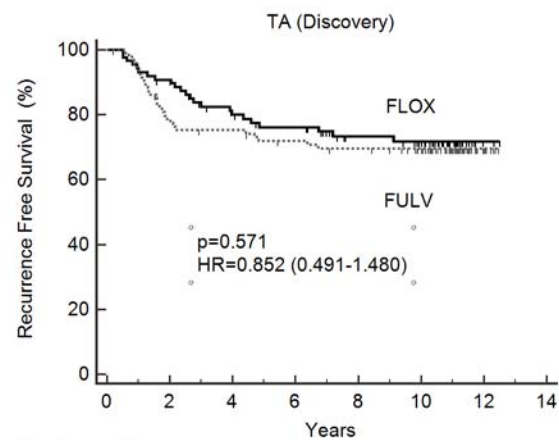

Number at risk

|      |    |    |    |    |    |    |   |   |
|------|----|----|----|----|----|----|---|---|
| FLOX | 87 | 78 | 64 | 59 | 46 | 40 | 3 | 0 |
| FULV | 96 | 72 | 68 | 63 | 60 | 53 | 7 | 0 |

Abbreviations: TA, transit amplifying.

**eFigure 7. Recurrence-free Survival for Colorectal Cancer Assigner (CRCA) Subtypes of Stage II and III Patients in the Discovery Cohort Treated with FULV and FLOX**

**A.**

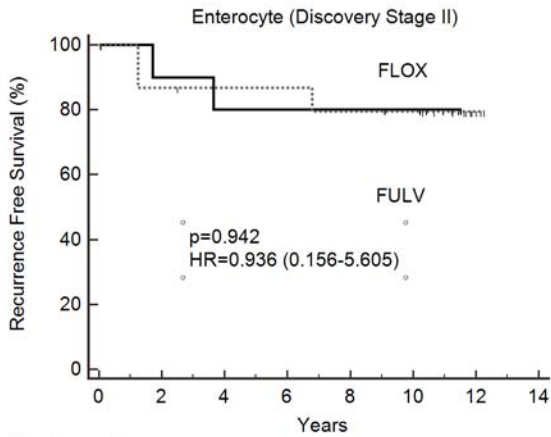

| Number at risk |  | 0  | 2  | 4  | 6  | 8  | 10 | 12 | 14 |
|----------------|--|----|----|----|----|----|----|----|----|
| FLOX           |  | 11 | 9  | 8  | 8  | 8  | 7  | 0  | 0  |
| FULV           |  | 15 | 13 | 12 | 12 | 11 | 11 | 3  | 0  |

**B.**

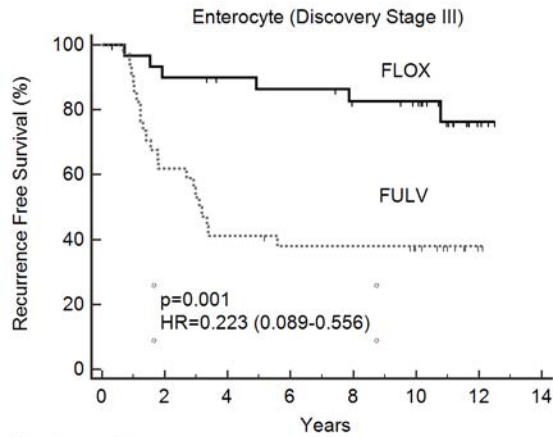

| Number at risk |  | 0  | 2  | 4  | 6  | 8  | 10 | 12 | 14 |
|----------------|--|----|----|----|----|----|----|----|----|
| FLOX           |  | 31 | 27 | 25 | 24 | 21 | 19 | 3  | 0  |
| FULV           |  | 34 | 21 | 14 | 12 | 12 | 9  | 1  | 0  |

**C.**

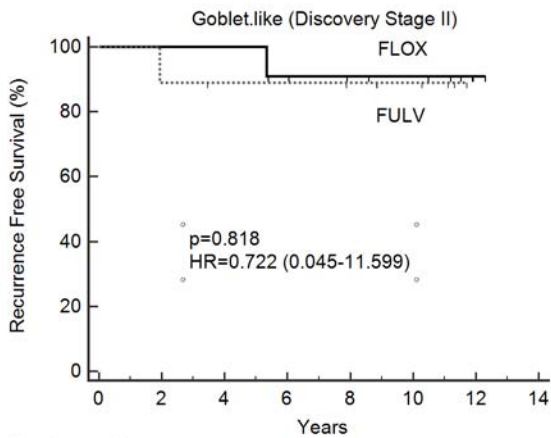

| Number at risk |  | 0  | 2  | 4  | 6 | 8 | 10 | 12 | 14 |
|----------------|--|----|----|----|---|---|----|----|----|
| FLOX           |  | 11 | 11 | 11 | 9 | 7 | 6  | 1  | 0  |
| FULV           |  | 9  | 8  | 7  | 7 | 6 | 4  | 0  | 0  |

**D.**

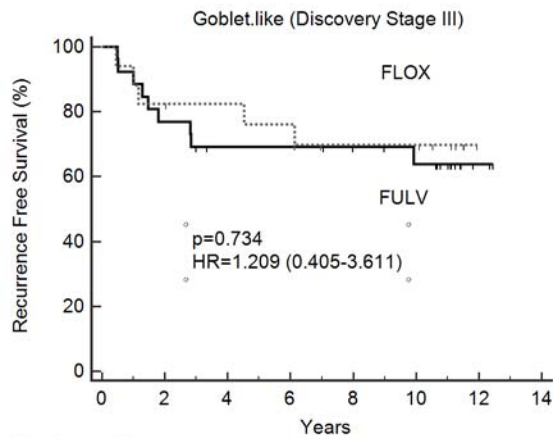

| Number at risk |  | 0  | 2  | 4  | 6  | 8  | 10 | 12 | 14 |
|----------------|--|----|----|----|----|----|----|----|----|
| FLOX           |  | 26 | 20 | 16 | 16 | 14 | 12 | 2  | 0  |
| FULV           |  | 17 | 14 | 13 | 12 | 9  | 9  | 0  | 0  |

**E.**

**F.**

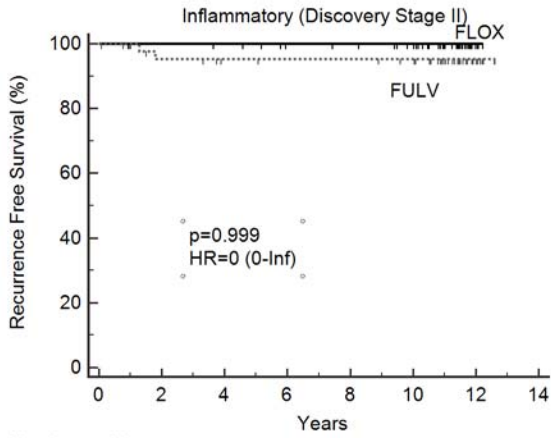

Number at risk

|      |    |    |    |    |    |    |   |   |
|------|----|----|----|----|----|----|---|---|
| FLOX | 44 | 42 | 41 | 36 | 35 | 31 | 3 | 0 |
| FULV | 44 | 39 | 36 | 35 | 35 | 33 | 7 | 0 |

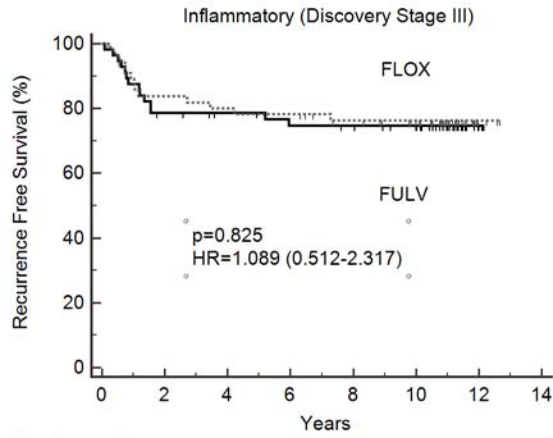

Number at risk

|      |    |    |    |    |    |    |   |   |
|------|----|----|----|----|----|----|---|---|
| FLOX | 57 | 43 | 40 | 37 | 36 | 32 | 3 | 0 |
| FULV | 57 | 46 | 44 | 43 | 38 | 32 | 3 | 0 |

**G.**

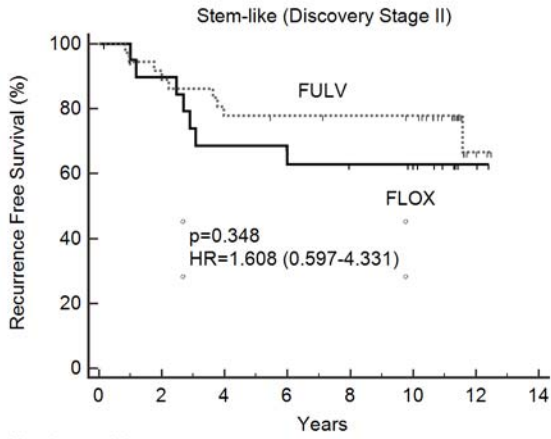

Number at risk

|      |    |    |    |    |    |    |   |   |
|------|----|----|----|----|----|----|---|---|
| FLOX | 21 | 17 | 13 | 11 | 10 | 9  | 2 | 0 |
| FULV | 36 | 32 | 28 | 27 | 26 | 25 | 3 | 0 |

**H.**

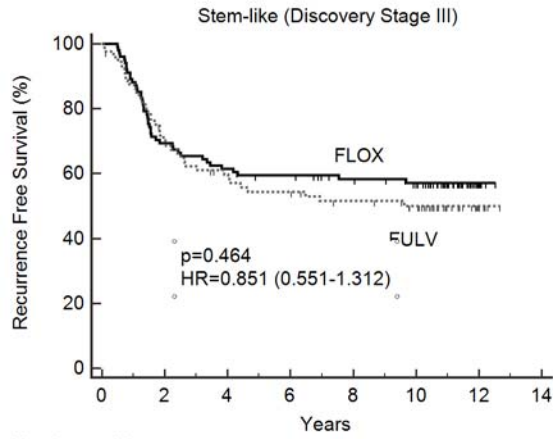

Number at risk

|      |     |    |    |    |    |    |   |   |
|------|-----|----|----|----|----|----|---|---|
| FLOX | 101 | 70 | 62 | 58 | 52 | 46 | 5 | 0 |
| FULV | 81  | 56 | 45 | 41 | 36 | 31 | 5 | 0 |

**I.**

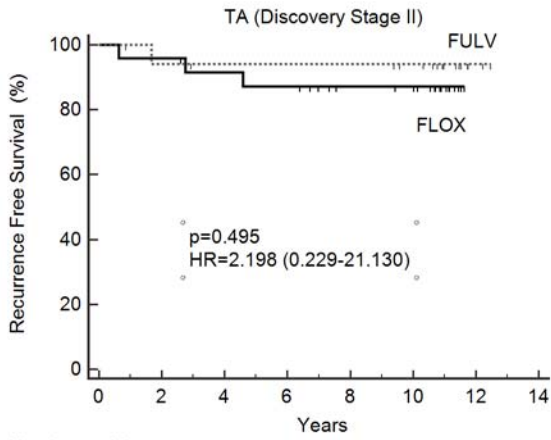

Number at risk

|      |    |    |    |    |    |    |   |   |
|------|----|----|----|----|----|----|---|---|
| FLOX | 24 | 23 | 21 | 20 | 15 | 14 | 0 | 0 |
| FULV | 18 | 16 | 15 | 15 | 15 | 13 | 2 | 0 |

**J.**

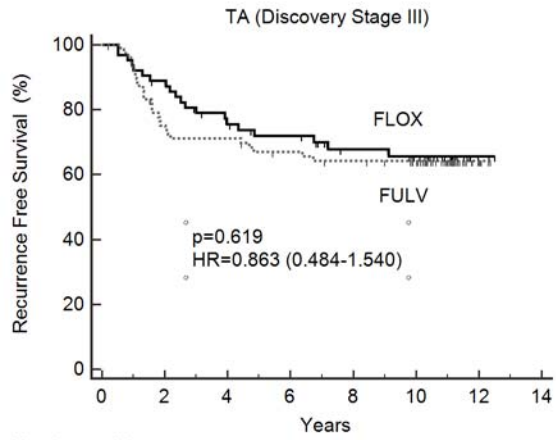

Number at risk

|      |    |    |    |    |    |    |   |   |
|------|----|----|----|----|----|----|---|---|
| FLOX | 63 | 55 | 43 | 39 | 31 | 26 | 3 | 0 |
| FULV | 78 | 56 | 53 | 48 | 45 | 40 | 5 | 0 |



**Prognostic and Predictive Value of Colorectal Cancer Assigner (CRCA) Subtypes in Validation Cohort**  
**eTable 12. Univariate and Multivariable Cox model for CRC Subtype Prognostic Value in Validation Cohort**

|             |                           | Univariate Analysis |             |             |         | Multivariate Analysis |             |             |         |
|-------------|---------------------------|---------------------|-------------|-------------|---------|-----------------------|-------------|-------------|---------|
|             |                           | HR                  | Lower (95%) | Upper (95%) | P Value | HR                    | Lower (95%) | Upper (95%) | P Value |
| Age         | >70 vs <70                | 0.92                | 0.64        | 1.31        | 0.627   | 0.92                  | 0.64        | 1.31        | 0.644   |
| Gender      | Male vs Female            | 0.97                | 0.75        | 1.25        | 0.797   | 0.95                  | 0.74        | 1.24        | 0.718   |
| Stage       | III vs II                 | 3.00                | 2.04        | 4.43        | 0.000   | 3.38                  | 2.26        | 5.05        | 0.000   |
| Grade       | High vs low               | 1.12                | 0.82        | 1.53        | 0.471   | 1.15                  | 0.83        | 1.58        | 0.395   |
| Tumor stage | T3 vs T1&T2               | 2.61                | 1.49        | 4.58        | 0.001   | 3.38                  | 1.91        | 6.00        | 0.000   |
|             | T4 vs T1&T2               | 3.48                | 1.77        | 6.88        | 0.000   | 4.14                  | 2.06        | 8.35        | 0.000   |
| Perforation | Yes vs No                 | 1.22                | 0.57        | 2.58        | 0.610   | 1.31                  | 0.60        | 2.87        | 0.499   |
| Obstruction | Yes vs No                 | 1.36                | 1.02        | 1.81        | 0.038   | 1.18                  | 0.87        | 1.58        | 0.288   |
| CRC         | Enterocyte vs Stem-like   | 0.60                | 0.39        | 0.94        | 0.024   | 0.72                  | 0.46        | 1.13        | 0.154   |
|             | Goblet-like vs Stem-like  | 0.84                | 0.55        | 1.28        | 0.413   | 1.10                  | 0.71        | 1.68        | 0.679   |
|             | Inflammatory vs Stem-like | 0.33                | 0.22        | 0.49        | 0.000   | 0.41                  | 0.27        | 0.61        | 0.000   |
|             | TA vs Stem-like           | 0.61                | 0.44        | 0.85        | 0.003   | 0.70                  | 0.50        | 0.98        | 0.036   |

Abbreviations: CRC, Colorectal cancer; TA, transit amplifying.

**eFigure 8. Recurrence-free Survival for Colorectal Cancer Assigner (CRCA) and Subtype of Stage III Patients in the Validation Cohort Treated with FULV and FLOX**

**A.**

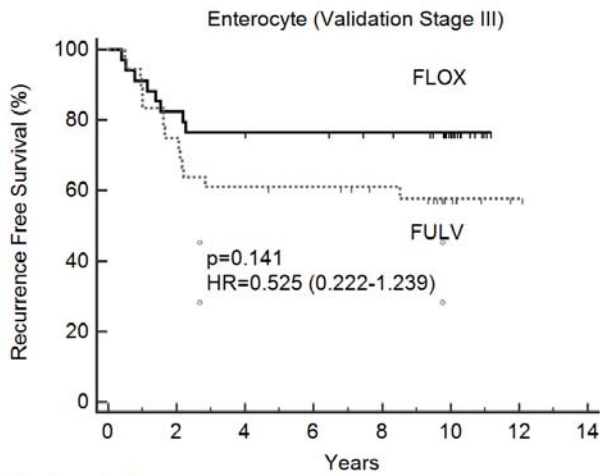

| Number at risk |  | 0  | 2  | 4  | 6  | 8  | 10 | 12 | 14 |
|----------------|--|----|----|----|----|----|----|----|----|
| FLOX           |  | 34 | 28 | 26 | 25 | 23 | 16 | 0  | 0  |
| FULV           |  | 36 | 27 | 22 | 21 | 18 | 8  | 1  | 0  |

**B.**

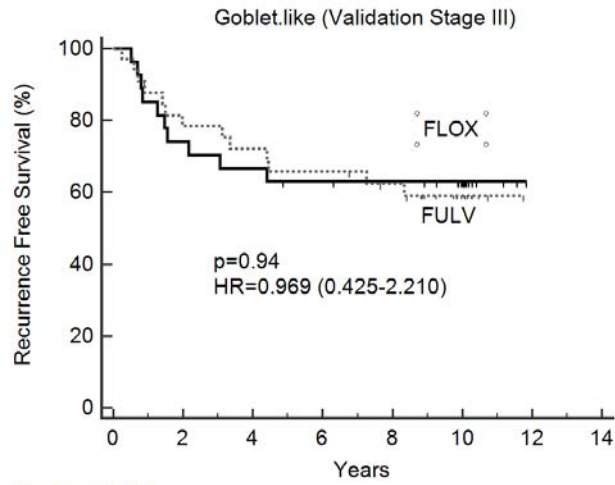

| Number at risk |  | 0  | 2  | 4  | 6  | 8  | 10 | 12 | 14 |
|----------------|--|----|----|----|----|----|----|----|----|
| FLOX           |  | 27 | 20 | 18 | 16 | 15 | 10 | 0  | 0  |
| FULV           |  | 33 | 25 | 23 | 21 | 18 | 8  | 0  | 0  |

**C.**

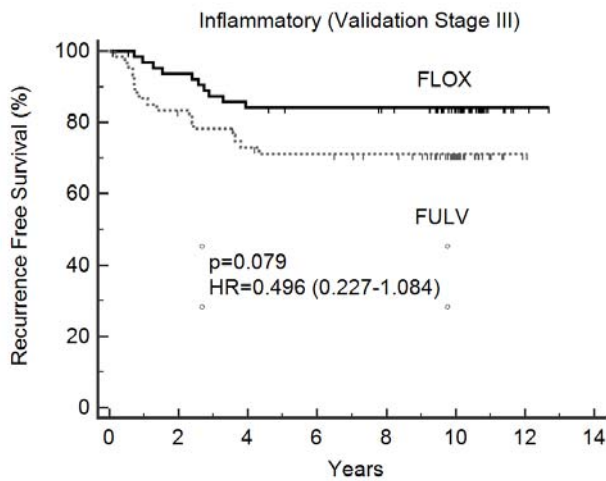

| Number at risk |  | 0  | 2  | 4  | 6  | 8  | 10 | 12 | 14 |
|----------------|--|----|----|----|----|----|----|----|----|
| FLOX           |  | 65 | 59 | 53 | 51 | 49 | 29 | 2  | 0  |
| FULV           |  | 60 | 49 | 42 | 40 | 37 | 22 | 1  | 0  |

**D.**

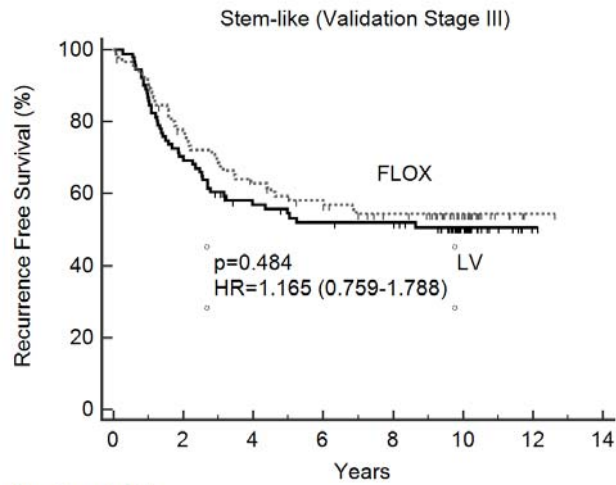

| Number at risk |  | 0  | 2  | 4  | 6  | 8  | 10 | 12 | 14 |
|----------------|--|----|----|----|----|----|----|----|----|
| FLOX           |  | 92 | 63 | 47 | 42 | 41 | 23 | 1  | 0  |
| FULV           |  | 93 | 67 | 54 | 46 | 38 | 20 | 1  | 0  |

**E.**

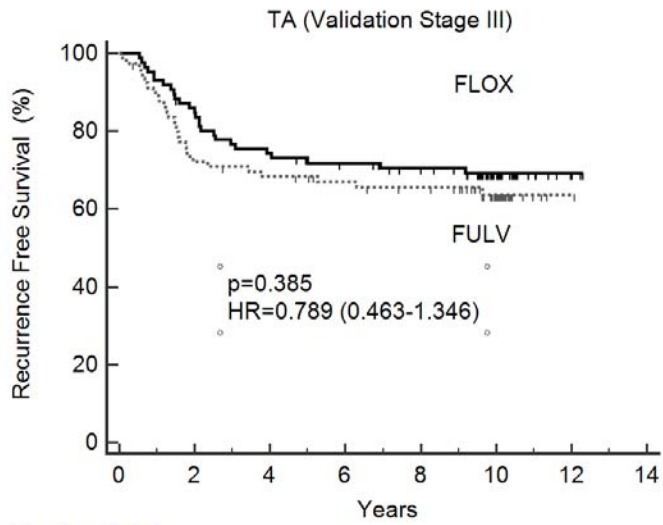

Number at risk

|      |    |    |    |    |    |    |   |   |
|------|----|----|----|----|----|----|---|---|
| FLOX | 86 | 72 | 63 | 58 | 53 | 30 | 3 | 0 |
| FULV | 80 | 57 | 53 | 49 | 46 | 22 | 1 | 0 |

Abbreviations: TA, transit amplifying.

## **Post-hoc Exploratory Analyses of the Entire C-07 Cohort with Colorectal Cancer Assigner (CRCA) and Consensus Molecular Subtypes (CMS)**

### **eResults 2. Consensus subtype assignment for C-07 samples**

Recently, Guinney et al.<sup>5</sup> studied the association among subtypes from six different subtyping classifiers, and clustered the 27 subtypes from six classifiers to 4 groups, named as Consensus Molecular Subtypes (CMS) 1-4 in the consensus subtype classifier. They further developed a 'single sample predictor' SSP method, which can be used to identify the CMS subtype for any new sample. The SSP method is based on a similarity-to-centroid approach, with the Pearson coefficient as a similarity measure. Note, the CMS classifier only classified samples with high confidence into consensus subtypes, resulting in some samples remaining unclassified.

To assign C-07 samples to the CMS subtype, we used the SSP method developed by Guinney et al. Note, the classifier for consensus subtype identification includes 693 genes, 37 of which were profiled by the nCounter code set used in C-07. We assigned C-07 samples to the consensus subtypes based on the centroid of the 37 genes. We used centroid information from the original consensus subtype classifier directly without redeveloping them. This may cause some bias of subtype identification.

In C-07, the association of CRCA and CMS in the discovery and validation cohorts is similar to the consensus paper and other datasets. Note, a greater portion of enterocyte samples fall into the unknown subtype than other CRCA subtypes.

**eTable 13. Correlation between Colorectal Cancer Assigner (CRCA) and Consensus Molecular Subtypes (CMS) Classifiers**

|         | <b>Enterocyte</b> | <b>Goblet-like</b> | <b>Inflammatory</b> | <b>Stem-like</b> | <b>TA</b>  |
|---------|-------------------|--------------------|---------------------|------------------|------------|
| CMS1    | 4                 | 22                 | <b>174</b>          | 28               | 3          |
| CMS2    | <b>57</b>         | 11                 | 24                  | 29               | <b>261</b> |
| CMS3    | 19                | <b>53</b>          | 6                   | 2                | 6          |
| CMS4    | 36                | 6                  | 11                  | <b>271</b>       | 10         |
| Unknown | 19                | 11                 | 24                  | 37               | 27         |

Numbers in bold indicate the greatest number of tumors categorized by the two different classifiers.

**eFigure 9. Oxaliplatin Benefit in Enterocyte versus Other Subtypes in All Stage III patients**

**A.**

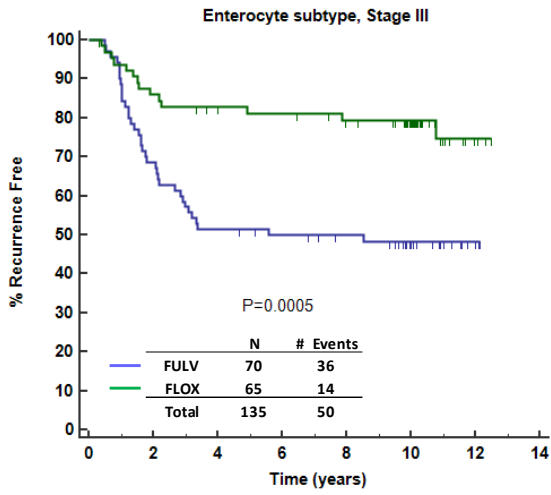

**B.**

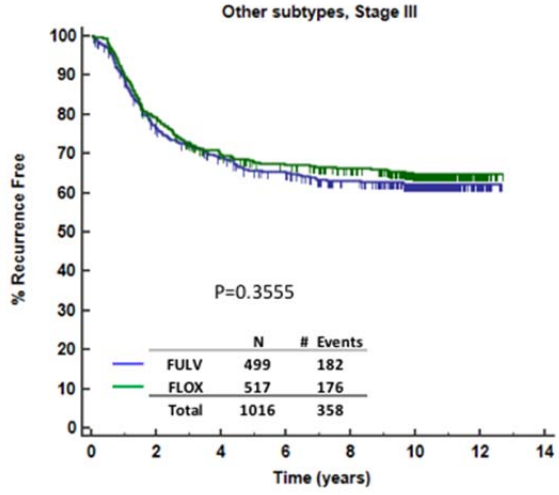

**eFigure 10. Recurrence-free Survival for Colorectal Cancer Assigner (CRCA) and CCS Subtype of Stage III Patients in the entire C-07 dataset Treated with FULV and FLOX**

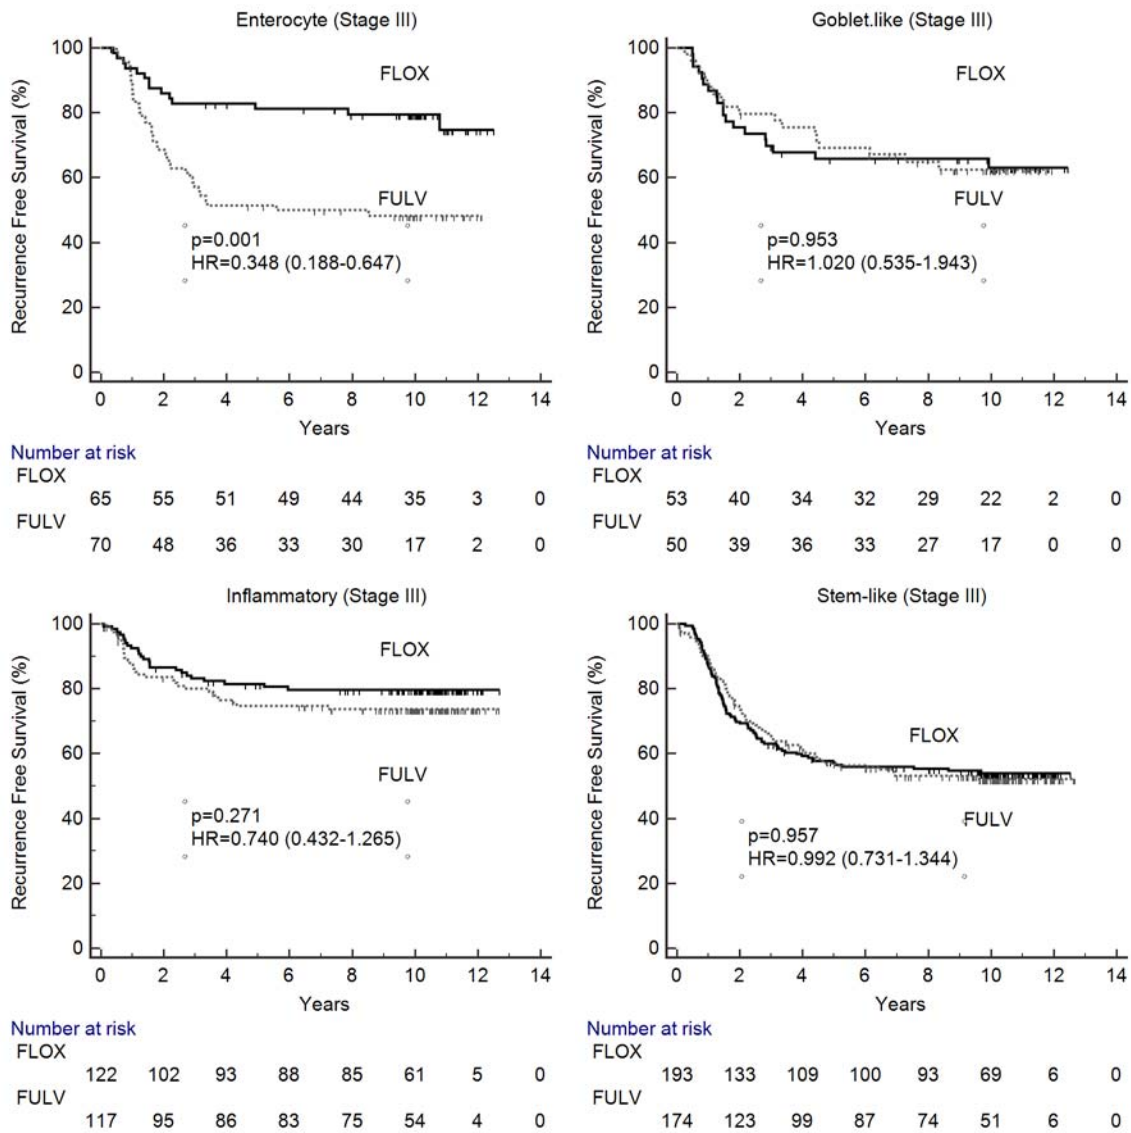

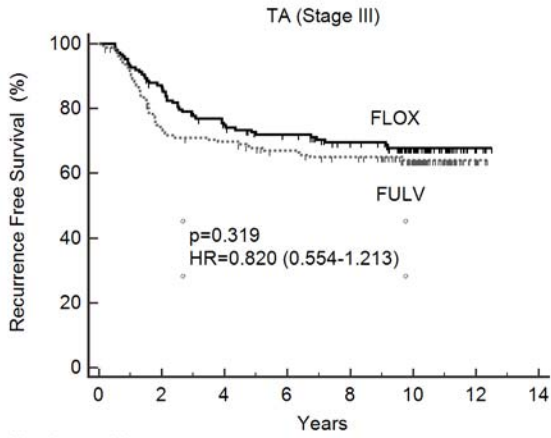

Number at risk

|      |     |     |     |    |    |    |   |   |
|------|-----|-----|-----|----|----|----|---|---|
| FLOX | 149 | 127 | 106 | 97 | 84 | 56 | 6 | 0 |
| FULV | 158 | 113 | 106 | 97 | 91 | 62 | 6 | 0 |

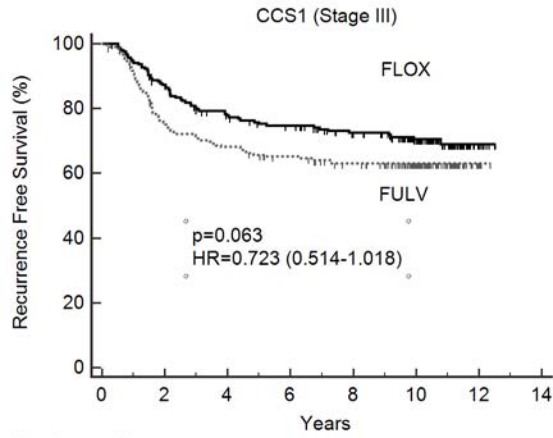

Number at risk

|      |     |     |     |     |     |    |    |   |
|------|-----|-----|-----|-----|-----|----|----|---|
| FLOX | 206 | 177 | 152 | 142 | 125 | 91 | 10 | 0 |
| FULV | 204 | 151 | 136 | 125 | 114 | 76 | 5  | 0 |

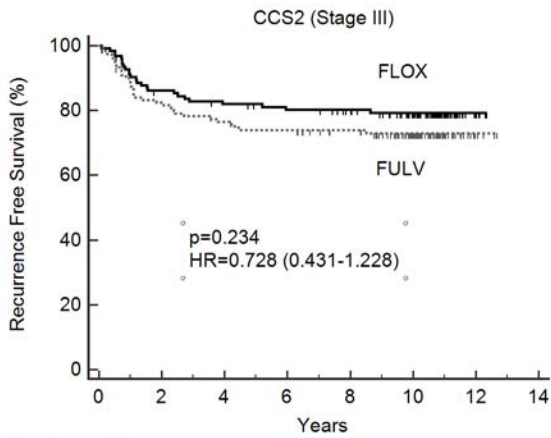

Number at risk

|      |     |     |    |    |    |    |   |   |
|------|-----|-----|----|----|----|----|---|---|
| FLOX | 125 | 104 | 98 | 94 | 89 | 62 | 6 | 0 |
| FULV | 120 | 98  | 90 | 86 | 78 | 52 | 4 | 0 |

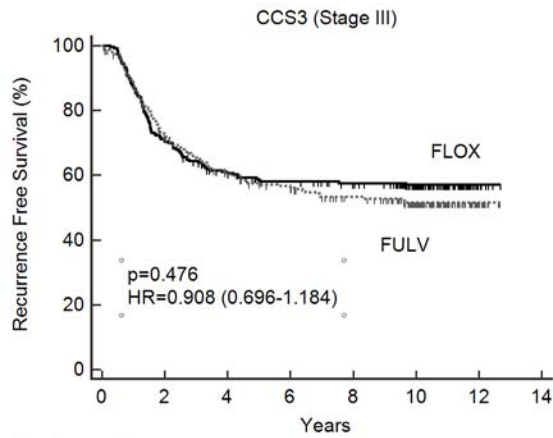

Number at risk

|      |     |     |     |     |     |    |   |   |
|------|-----|-----|-----|-----|-----|----|---|---|
| FLOX | 251 | 176 | 143 | 130 | 121 | 90 | 6 | 0 |
| FULV | 245 | 169 | 137 | 122 | 105 | 73 | 9 | 0 |



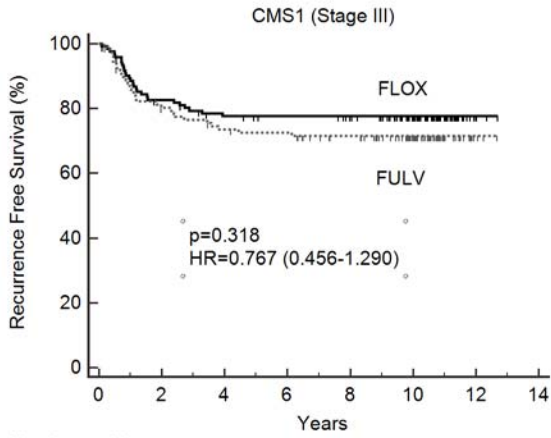

Number at risk

|      |     |    |    |    |    |    |   |   |
|------|-----|----|----|----|----|----|---|---|
| FLOX | 123 | 99 | 90 | 87 | 83 | 54 | 3 | 0 |
| FULV | 108 | 84 | 76 | 74 | 65 | 44 | 3 | 0 |

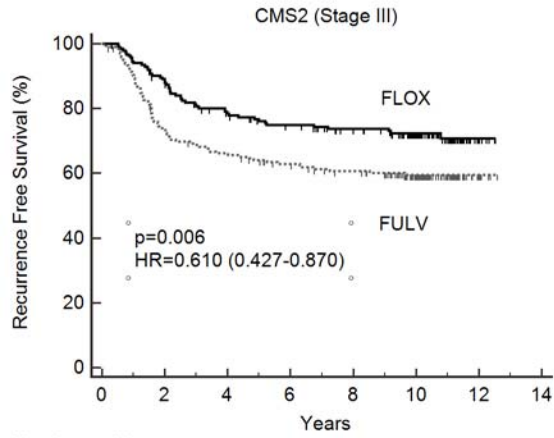

Number at risk

|      |     |     |     |     |     |    |   |   |
|------|-----|-----|-----|-----|-----|----|---|---|
| FLOX | 184 | 159 | 137 | 126 | 114 | 81 | 8 | 0 |
| FULV | 198 | 142 | 127 | 115 | 106 | 72 | 7 | 0 |

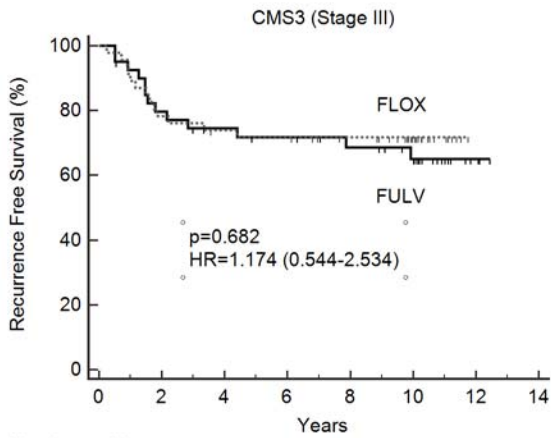

Number at risk

|      |    |    |    |    |    |    |   |   |
|------|----|----|----|----|----|----|---|---|
| FLOX | 40 | 31 | 27 | 25 | 22 | 18 | 3 | 0 |
| FULV | 46 | 36 | 33 | 32 | 28 | 17 | 0 | 0 |

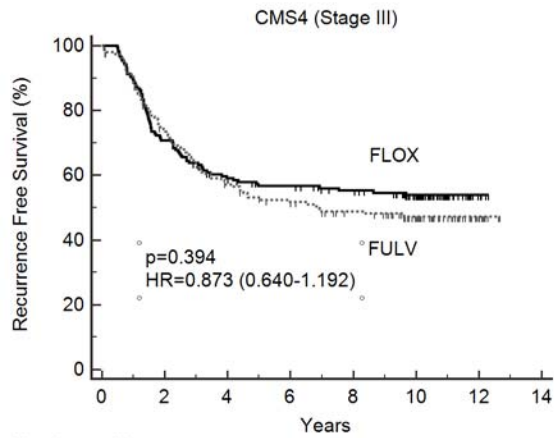

Number at risk

|      |     |     |    |    |    |    |   |   |
|------|-----|-----|----|----|----|----|---|---|
| FLOX | 175 | 123 | 99 | 91 | 83 | 62 | 4 | 0 |
| FULV | 159 | 113 | 86 | 75 | 64 | 45 | 8 | 0 |

## eReferences

1. Sadanandam A, Lyssiotis CA, Homicsko K, et al. A colorectal cancer classification system that associates cellular phenotype and responses to therapy. *Nat Med*. 2013; 19:619-625.
2. De Sousa E Melo F, Wang X, Jansen M, et al. Poor-prognosis colon cancer is defined by a molecularly distinct subtype and develops from serrated precursor lesions. *Nat Med*. 2013; 19: 614-618.
3. Tibshirani R, Hastie T, Narasimhan B, Chu G. Diagnosis of multiple cancer types by shrunken centroids of gene expression. *Proc Natl Acad Sci U S A*. 2002; 99: 6567-6572.
4. Peterson B, George SL. Sample size requirements and length of study for testing interaction in a 2 x k factorial design when time-to-failure is the outcome [corrected]. *Control Clin Trials*. 1993; 14:511-22.
5. Guinney J, Dienstmann R, Wang X, et al. The consensus molecular subtypes of colorectal cancer. *Nat Med*. 2015; 21:1350-1356.
